# Supplementary material for: New and bioactive natural products from an endophyte of Panax notoginseng
Source: Royal Society of Chemistry journal article supplement (doi:10.1039/c7ra07060h), 2017-01-01
Supplement: c7ra07060h1.pdf [file c7ra07060h1.pdf]

## Supporting Information

Jun Xie<sup>1+</sup>, Yingying Wu<sup>1+</sup>, Tianyuan Zhang<sup>1</sup>, Mengyue Zhang<sup>1</sup>, Weiwei Zhu<sup>1</sup>,  
Elizabeth A Gullen<sup>2</sup>, Zhaojie Wang<sup>3</sup>, Yung-Chi Cheng<sup>2</sup>, Yixuan Zhang<sup>1\*</sup>

<sup>1</sup>School of Life Science and Biopharmaceutics, Shenyang Pharmaceutical University,  
Shenyang, 110016, People's Republic of China

<sup>2</sup>Department of Pharmacology, Yale University School of Medicine, New Haven, CT  
06520, United States of America

<sup>3</sup>Yunnan Provincial Academy of Science and Technology, Kunming, 650051, People's  
Republic of China

<sup>+</sup>These authors contributed equally to this work

## Table of contents

|                                                                                     |    |
|-------------------------------------------------------------------------------------|----|
| Figure S1. $^1\text{H}$ NMR (600 MHz, methanol- $d_4$ ) spectrum of 1 .....         | 4  |
| Figure S2. $^{13}\text{C}$ NMR (150MHz, methanol- $d_4$ ) spectrum of 1.....        | 5  |
| Figure S3. $^1\text{H}$ - $^1\text{H}$ COSY spectrum of 1 in methanol- $d_4$ .....  | 6  |
| Figure S4. HSQC spectrum of 1 in methanol- $d_4$ .....                              | 7  |
| Figure S5. HMBC spectrum of 1 in methanol- $d_4$ .....                              | 8  |
| Figure S6. NOSEY spectrum of 1 in methanol- $d_4$ .....                             | 9  |
| Figure S7. HRESIMS spectrum of 1 .....                                              | 10 |
| Figure S8. $^1\text{H}$ NMR (600 MHz, methanol- $d_4$ ) spectrum of 2 .....         | 10 |
| Figure S9. $^{13}\text{C}$ NMR (150 MHz, methanol- $d_4$ ) spectrum of 2 .....      | 11 |
| Figure S10. $^1\text{H}$ - $^1\text{H}$ COSY spectrum of 2 in methanol- $d_4$ ..... | 12 |
| Figure S11. HSQC spectrum of 2 in methanol- $d_4$ .....                             | 13 |
| Figure S12. HMBC spectrum of 2 in methanol- $d_4$ .....                             | 14 |
| Figure S13. NOSEY spectrum of 2 in DMSO- $d_6$ .....                                | 15 |
| Figure S14. HRESIMS spectrum of 2.....                                              | 16 |
| Figure S15. $^1\text{H}$ NMR (600 MHz, methanol- $d_4$ ) spectrum of 3 .....        | 16 |
| Figure S16. $^{13}\text{C}$ NMR (150 MHz, methanol- $d_4$ ) spectrum of 3.....      | 17 |
| Figure S17. $^1\text{H}$ - $^1\text{H}$ COSY spectrum of 3 in methanol- $d_4$ ..... | 18 |
| Figure S18. HSQC spectrum of 3 in methanol- $d_4$ .....                             | 19 |
| Figure S19. HMBC spectrum of 3 in methanol- $d_4$ .....                             | 20 |
| Figure S20. NOSEY spectrum of 3 in DMSO- $d_6$ .....                                | 21 |
| Figure S21. HRESIMS spectrum of 3.....                                              | 22 |
| Figure S22. $^1\text{H}$ NMR (600 MHz, methanol- $d_4$ ) spectrum of 4.....         | 22 |
| Figure S23. $^{13}\text{C}$ NMR (150 MHz, methanol- $d_4$ ) spectrum of 4.....      | 23 |
| Figure S24. $^1\text{H}$ - $^1\text{H}$ COSY spectrum of 4 in methanol- $d_4$ ..... | 24 |
| Figure S25. HSQC spectrum of 4 in methanol- $d_4$ .....                             | 25 |
| Figure S26. HMBC spectrum of 4 in methanol- $d_4$ .....                             | 26 |
| Figure S27. NOSEY spectrum of 4 in DMSO- $d_6$ .....                                | 27 |
| Figure S28. HRESIMS spectrum of 4.....                                              | 28 |
| Figure S29. $^1\text{H}$ NMR (600 MHz, methanol- $d_4$ ) spectrum of 5 .....        | 28 |
| Figure S30. $^{13}\text{C}$ NMR (150 MHz, methanol- $d_4$ ) spectrum of 5 .....     | 29 |

|                                                                                                                                                                                                                                                                                               |    |
|-----------------------------------------------------------------------------------------------------------------------------------------------------------------------------------------------------------------------------------------------------------------------------------------------|----|
| Figure S31. <sup>1</sup> H- <sup>1</sup> H COSY spectrum of 5 in methanol-d4 .....                                                                                                                                                                                                            | 30 |
| Figure S32. HSQC spectrum of 5 in methanol-d4 .....                                                                                                                                                                                                                                           | 31 |
| Figure S33. HMBC spectrum of 5 in methanol-d4 .....                                                                                                                                                                                                                                           | 32 |
| Figure S34. NOSEY spectrum of 5 in DMSO-d6 .....                                                                                                                                                                                                                                              | 33 |
| Figure S35. HRESIMS spectrum of 5 .....                                                                                                                                                                                                                                                       | 34 |
| Figure S36. <sup>1</sup> H NMR (600 MHz, chloroform-d) spectrum of 1a-R .....                                                                                                                                                                                                                 | 34 |
| Figure S37. <sup>1</sup> H NMR (600 MHz, chloroform-d) spectrum of 1b-S .....                                                                                                                                                                                                                 | 35 |
| Figure S38. <sup>1</sup> H NMR (600 MHz, chloroform-d) spectrum of 2a-R .....                                                                                                                                                                                                                 | 36 |
| Figure S39. <sup>1</sup> H NMR (600 MHz, chloroform-d) spectrum of 2b-S .....                                                                                                                                                                                                                 | 37 |
| Figure S40. <sup>1</sup> H NMR (600 MHz, chloroform-d) spectrum of 3a-R .....                                                                                                                                                                                                                 | 38 |
| Figure S41. <sup>1</sup> H NMR (600 MHz, chloroform-d) spectrum of 3b-S .....                                                                                                                                                                                                                 | 39 |
| Figure S42. <sup>1</sup> H NMR (600 MHz, chloroform-d) spectrum of 4a-R .....                                                                                                                                                                                                                 | 40 |
| Figure S43. <sup>1</sup> H NMR (600 MHz, chloroform-d) spectrum of 4b-S .....                                                                                                                                                                                                                 | 41 |
| Figure S44. <sup>1</sup> H NMR (600 MHz, chloroform-d) spectrum of 5a-R .....                                                                                                                                                                                                                 | 42 |
| Figure S45. <sup>1</sup> H NMR (600 MHz, chloroform-d) spectrum of 5b-S .....                                                                                                                                                                                                                 | 43 |
| Figure S46-50. IR spectrum of 1,2,3,4,5 .....                                                                                                                                                                                                                                                 | 44 |
| Figure S51 The CD profiles of compounds <b>1</b> (A), <b>2</b> (B), <b>3</b> (C), <b>4</b> (D), <b>5</b> (E) .....                                                                                                                                                                            | 46 |
| Figure S52 The plausible biosynthetic pathways of compounds <b>1-7</b> .....                                                                                                                                                                                                                  | 48 |
| Table S1 <sup>1</sup> H NMR Chemical Shift Data for Diagnostic Signals from the (S)- and (R)-<br>Ester Derivatives of <b>1</b> <sup>a</sup> , <b>2</b> <sup>b</sup> , <b>3</b> <sup>c</sup> , <b>4</b> <sup>d</sup> , <b>5</b> <sup>e</sup> (Measured at 600 MHz in CDCl <sub>3</sub> ) ..... | 49 |

Figure S1. <sup>1</sup>H NMR (600 MHz, methanol-d<sub>4</sub>) spectrum of 1

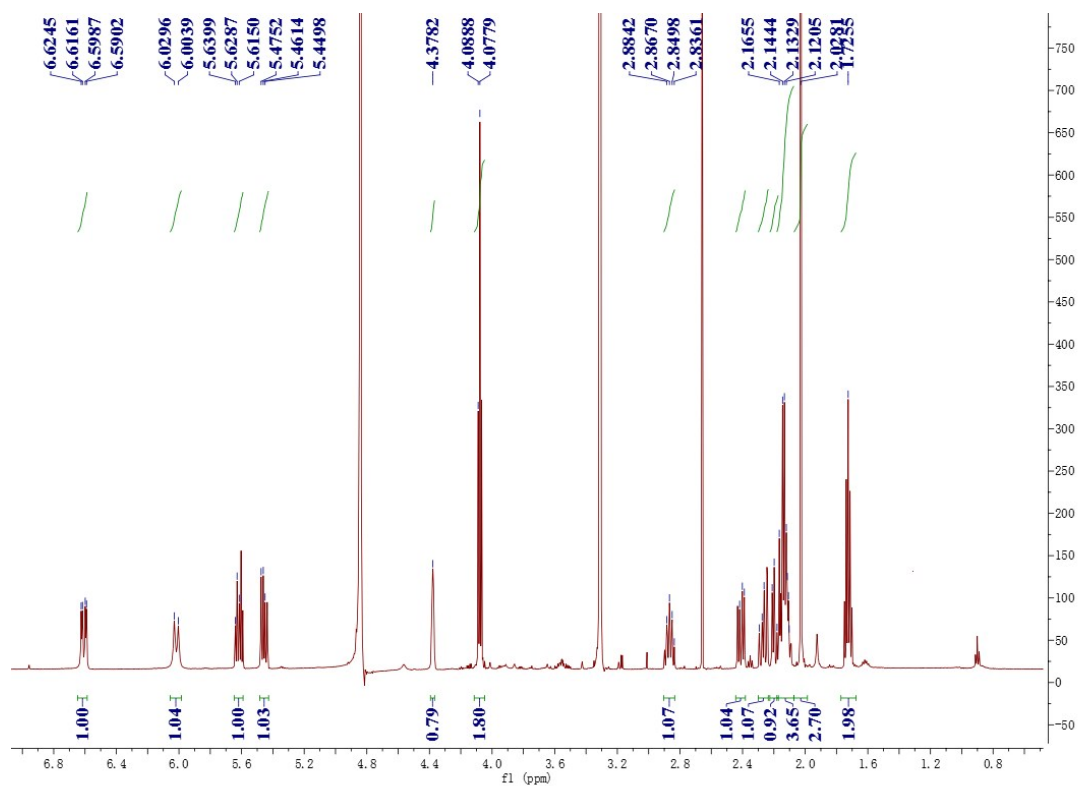

Figure S2.  $^{13}\text{C}$  NMR (150MHz, methanol-d<sub>4</sub>) spectrum of 1

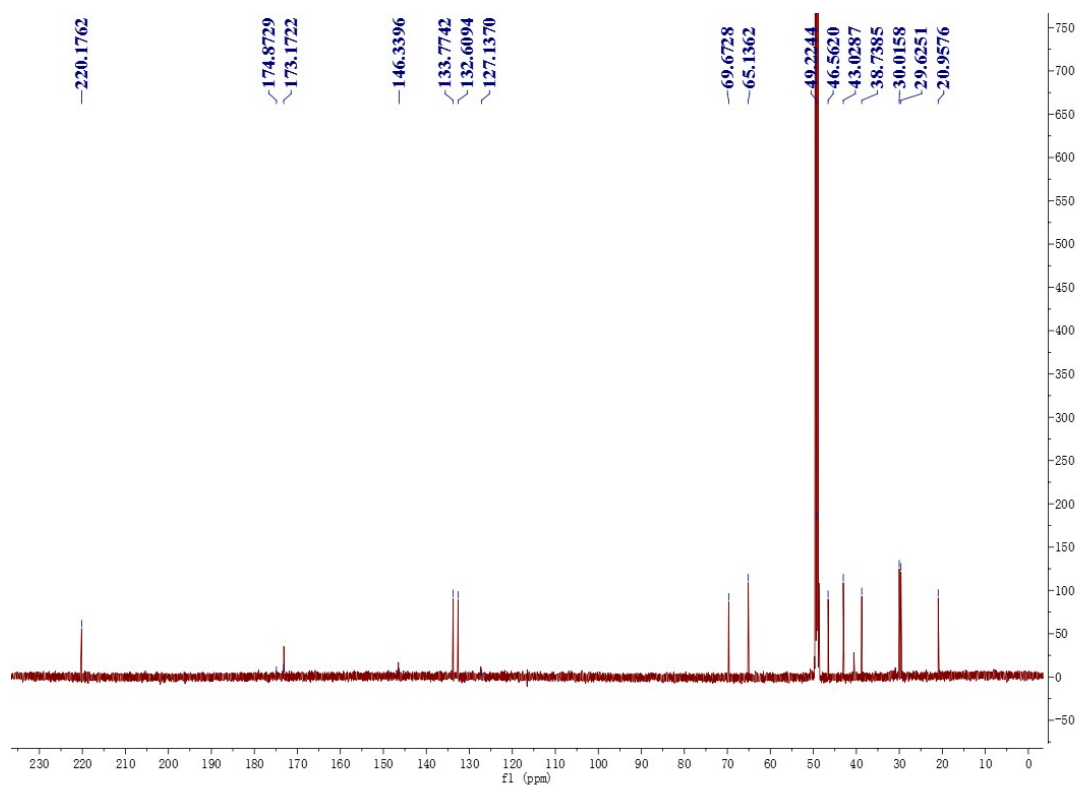

Figure S3.  $^1\text{H}$ - $^1\text{H}$  COSY spectrum of 1 in methanol- $d_4$

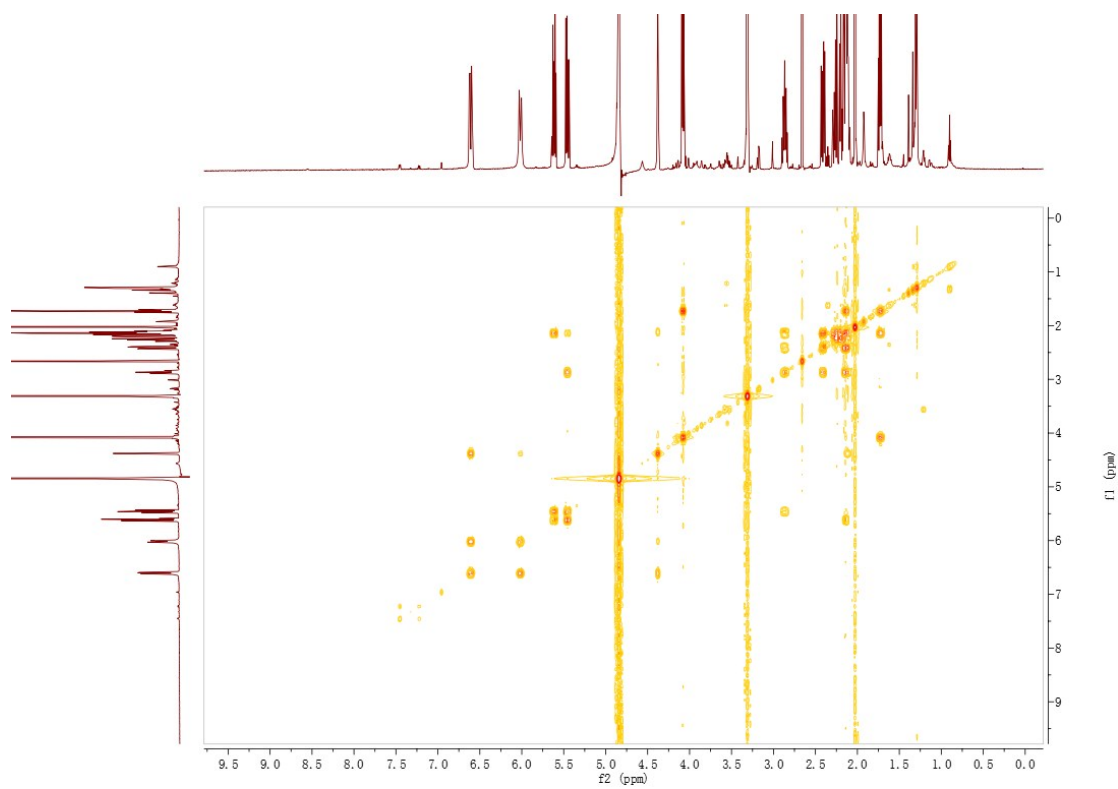

Figure S4. HSQC spectrum of 1 in methanol-d4

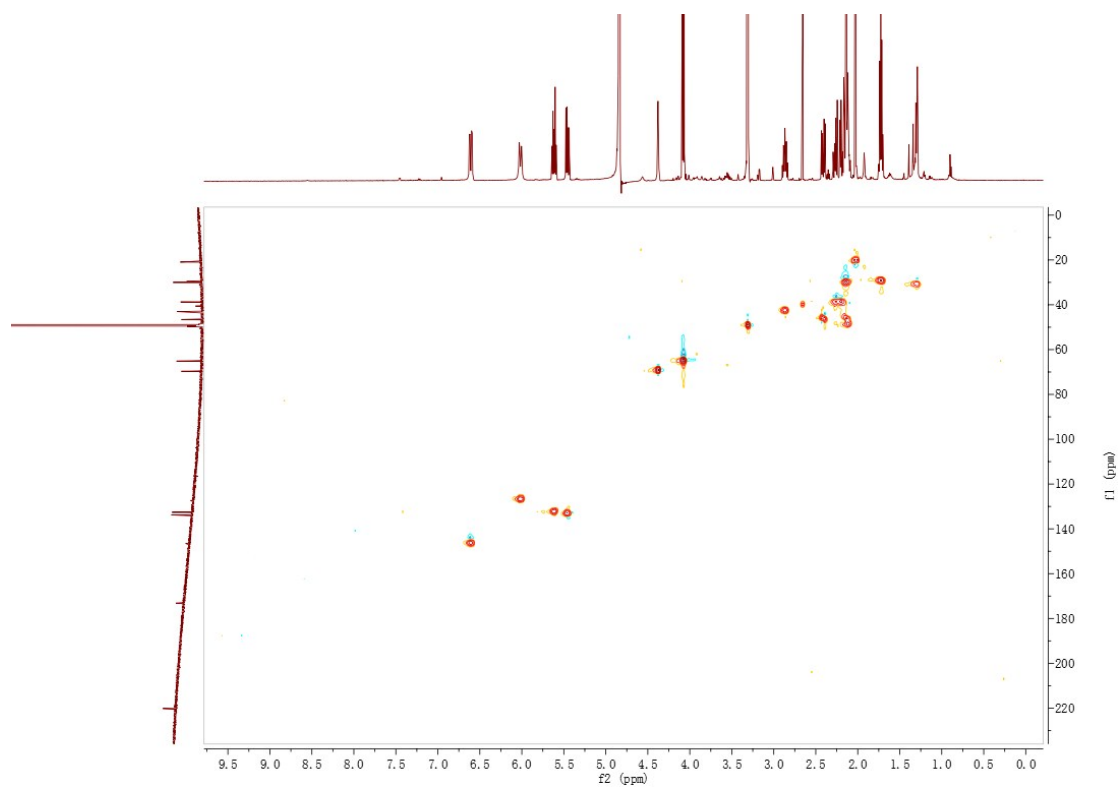

Figure S5. HMBC spectrum of 1 in methanol-d4

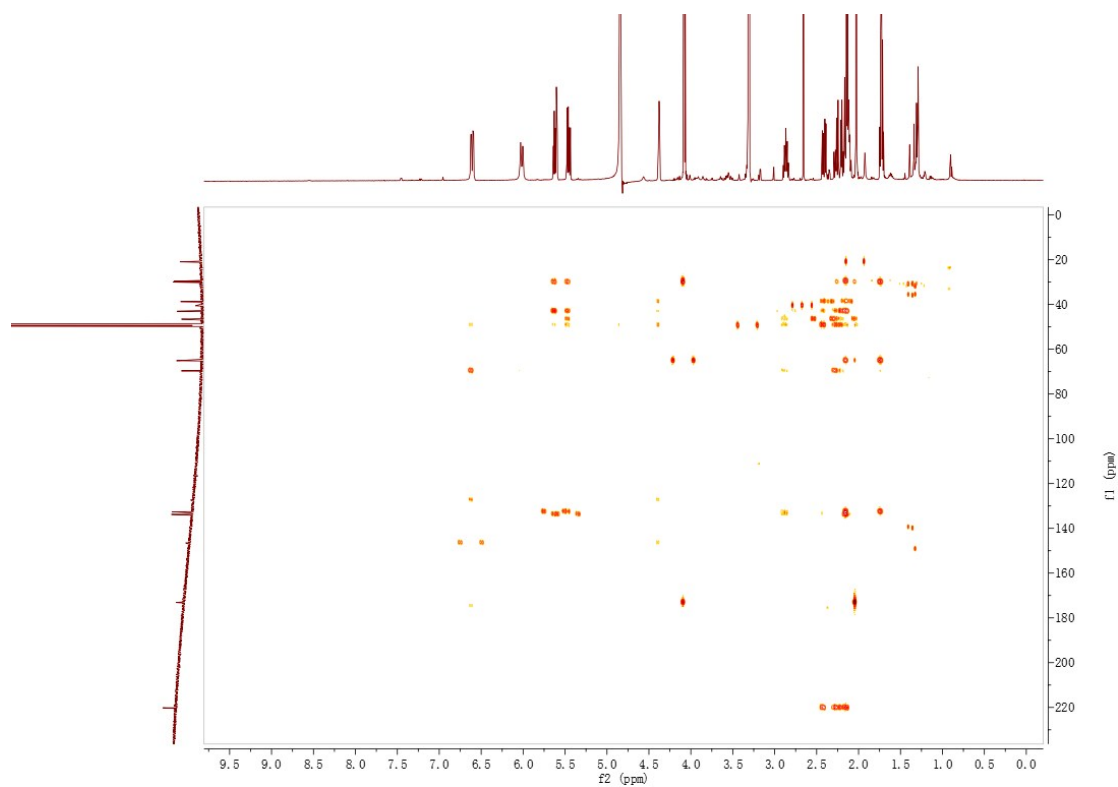



Figure S6. NOSEY spectrum of 1 in methanol-d4

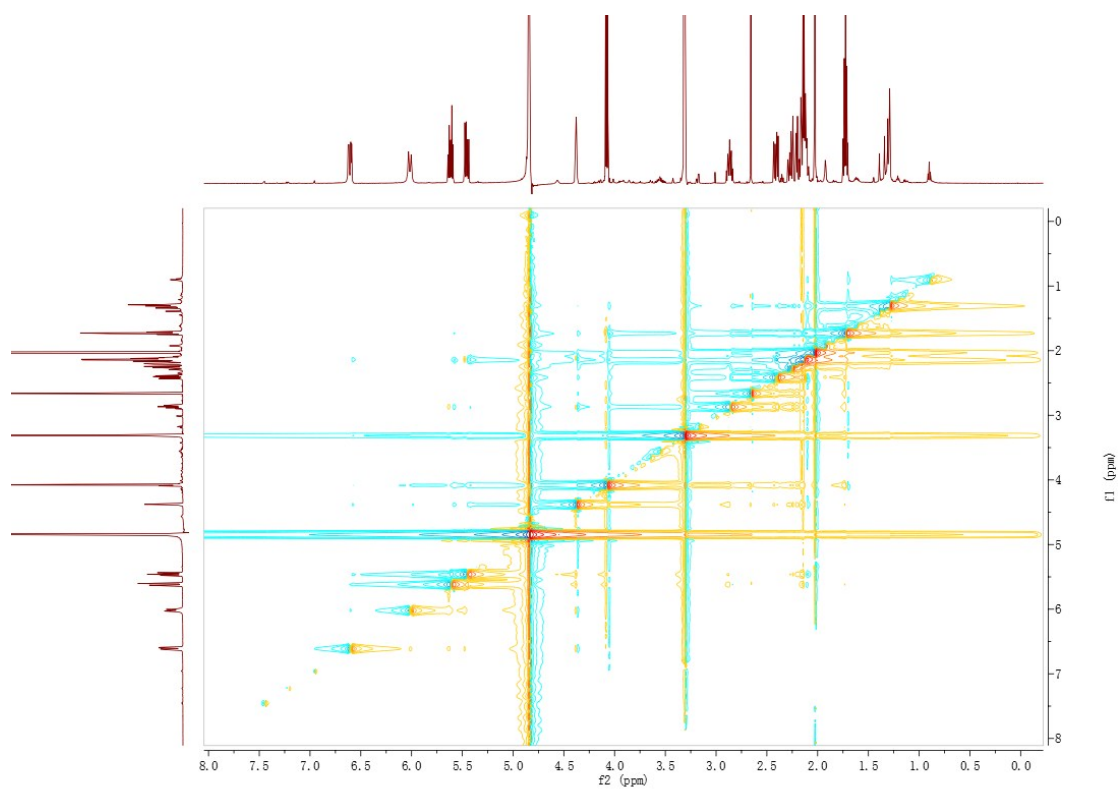

Figure S6 parts expand

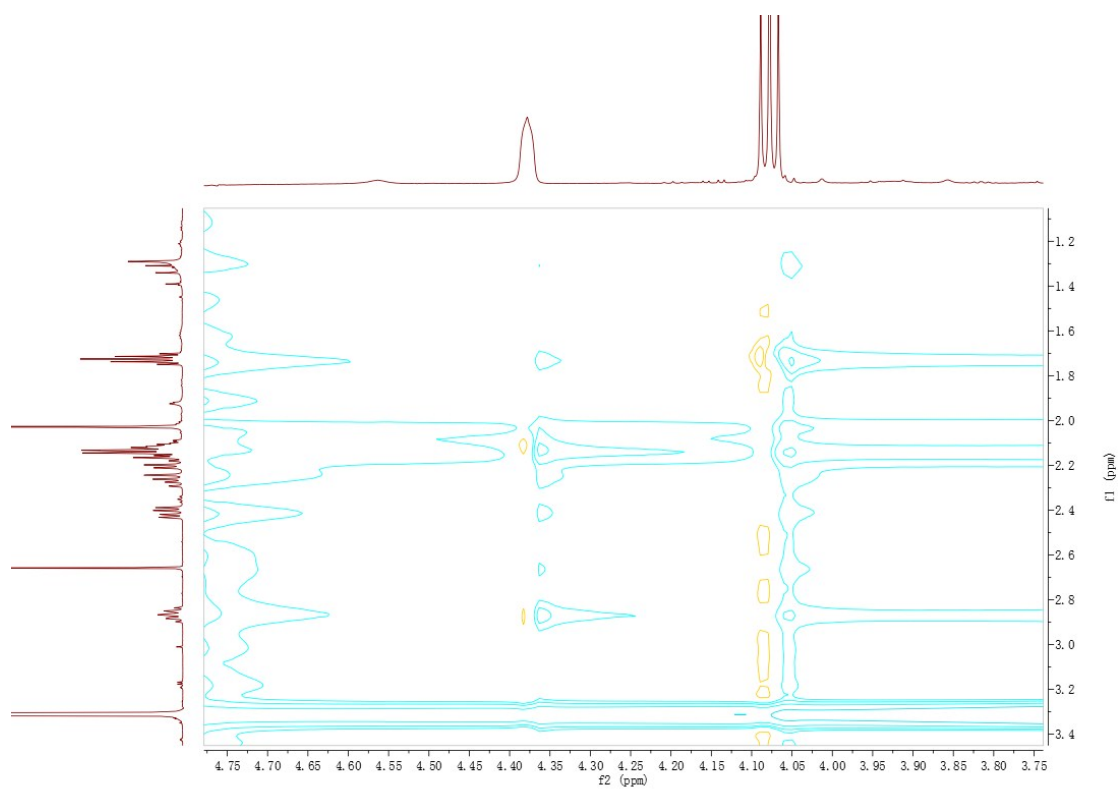

Figure S7. HRESIMS spectrum of 1

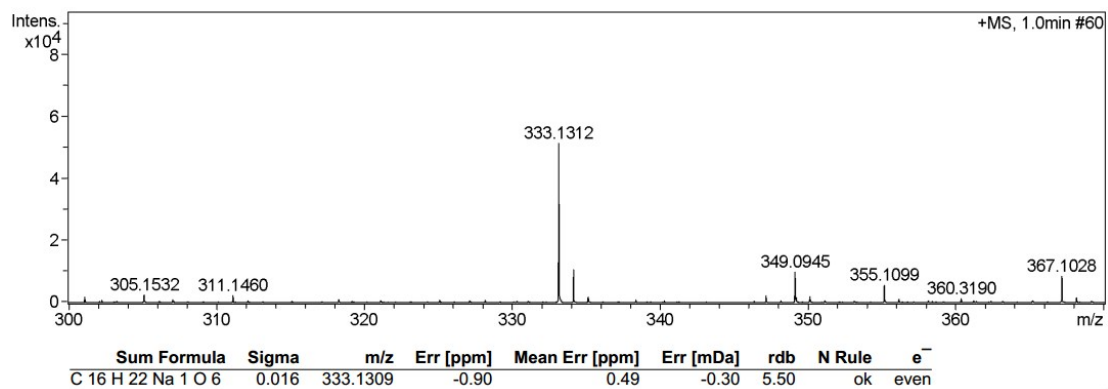

Figure S8. <sup>1</sup>H NMR (600 MHz, methanol-d<sub>4</sub>) spectrum of 2

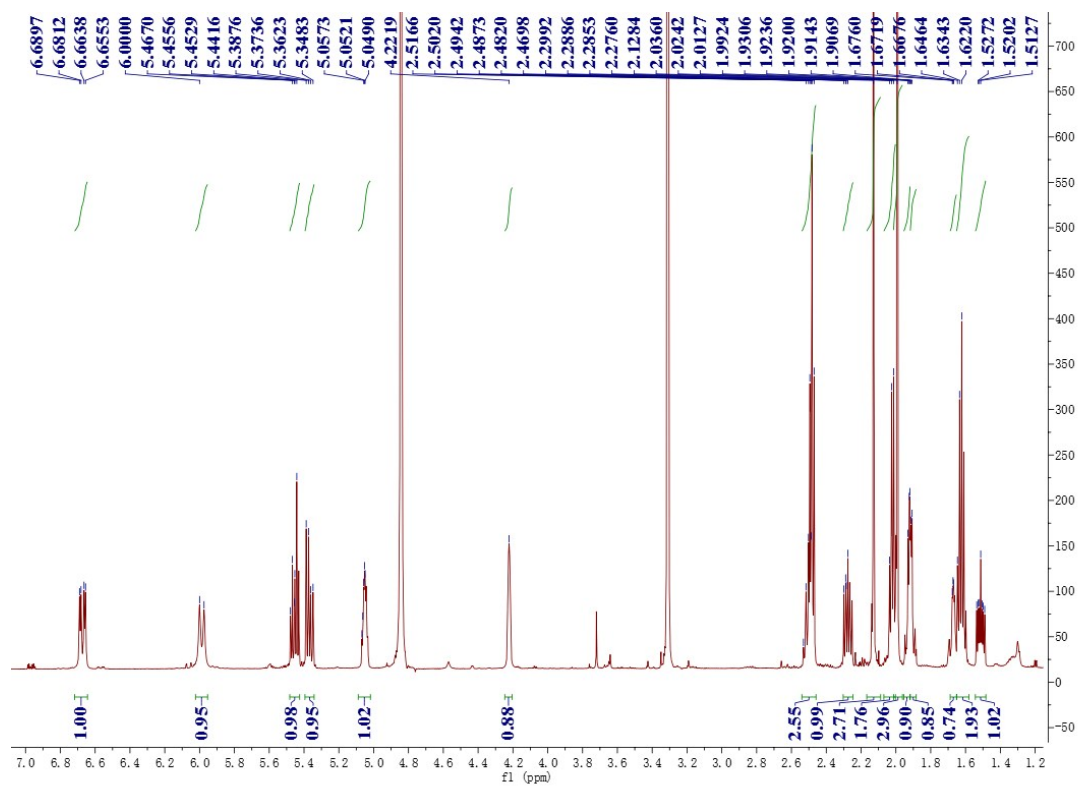

Figure S9.  $^{13}\text{C}$  NMR (150 MHz, methanol- $d_4$ ) spectrum of 2

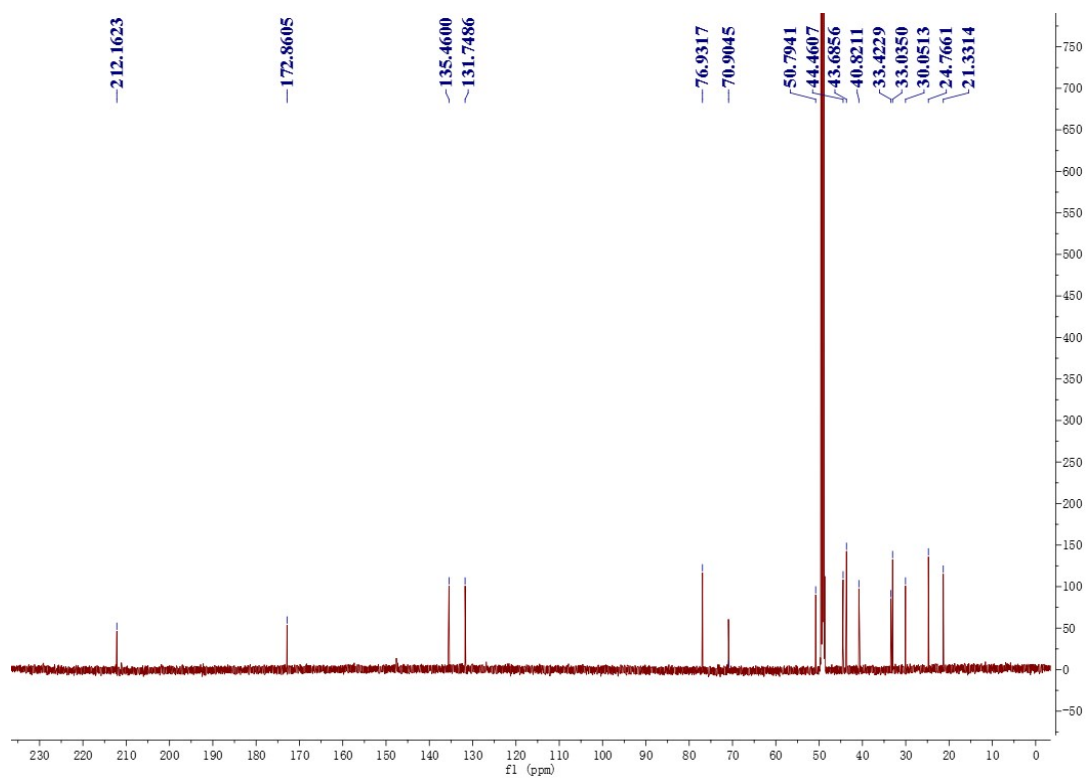

Figure S10.  $^1\text{H}$ - $^1\text{H}$  COSY spectrum of 2 in methanol- $d_4$

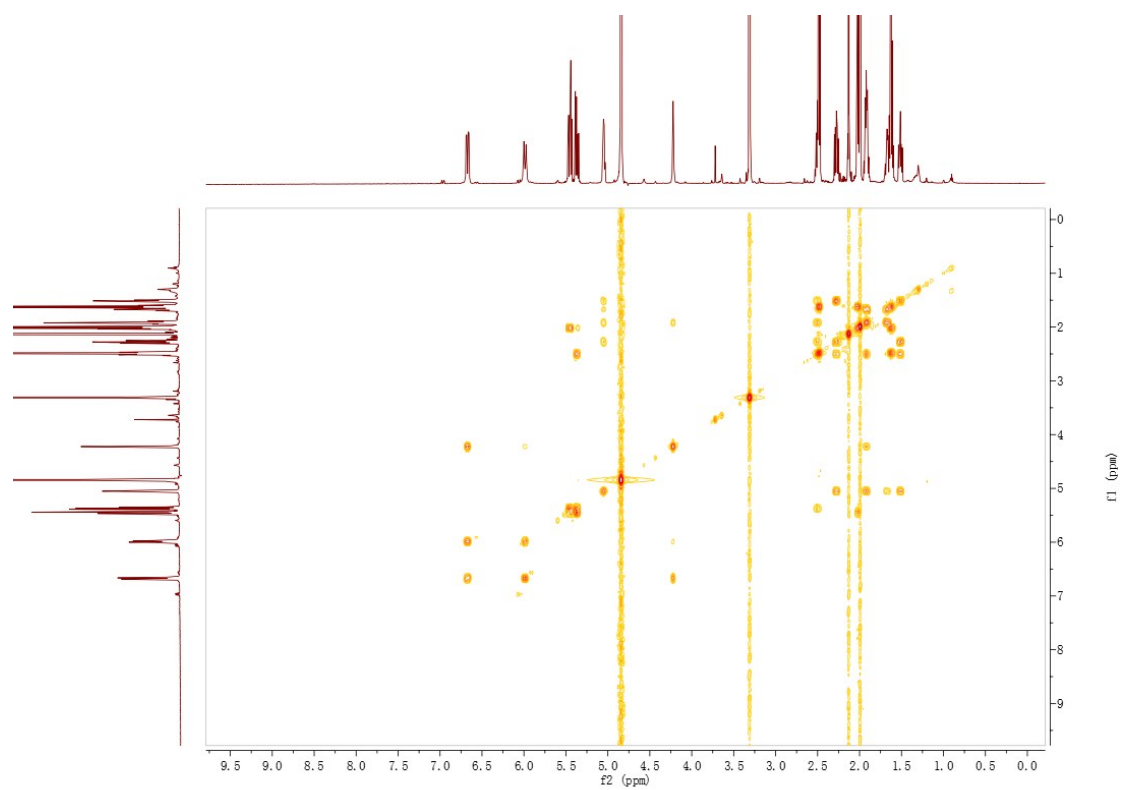

Figure S11. HSQC spectrum of 2 in methanol-d4

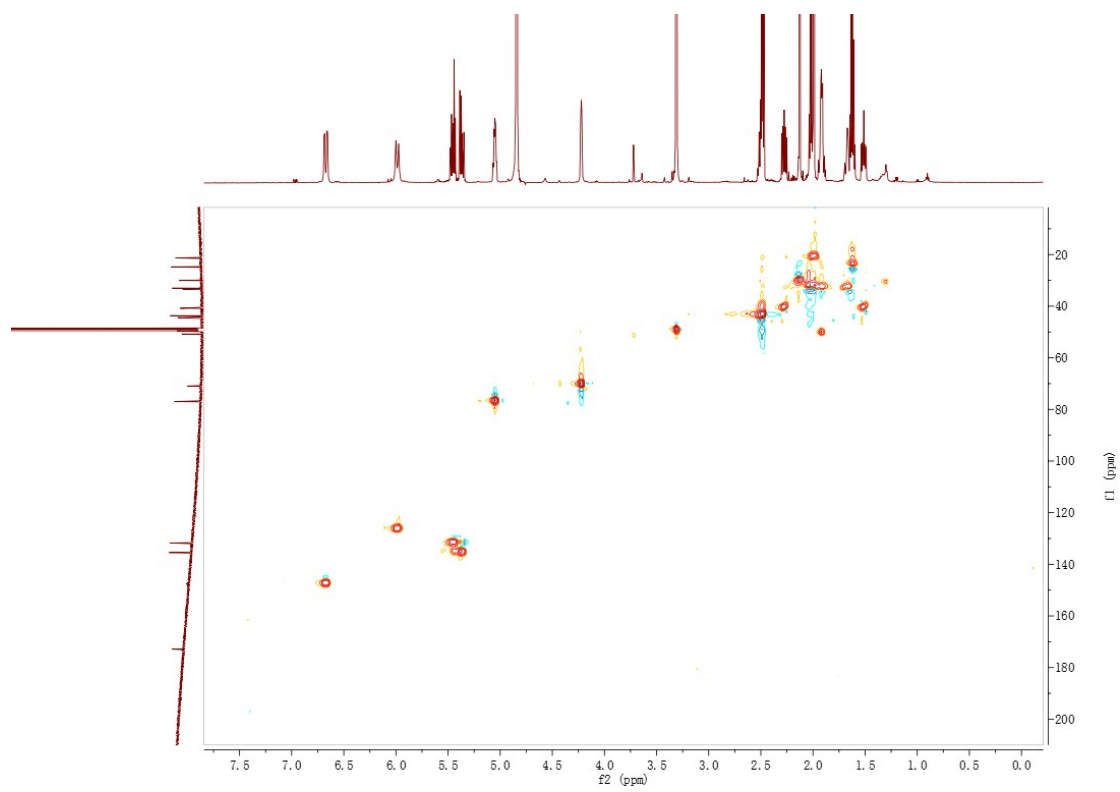

Figure S12. HMBC spectrum of 2 in methanol-d4

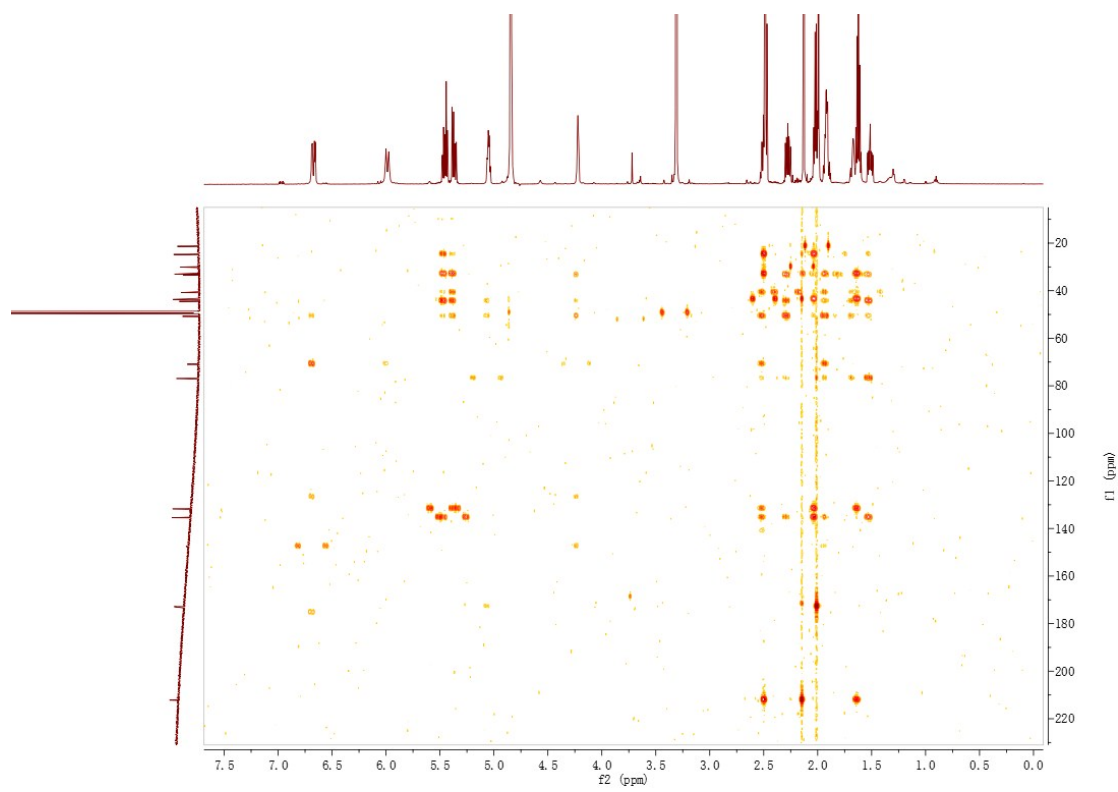

Figure S13. NOSEY spectrum of 2 in DMSO-d6

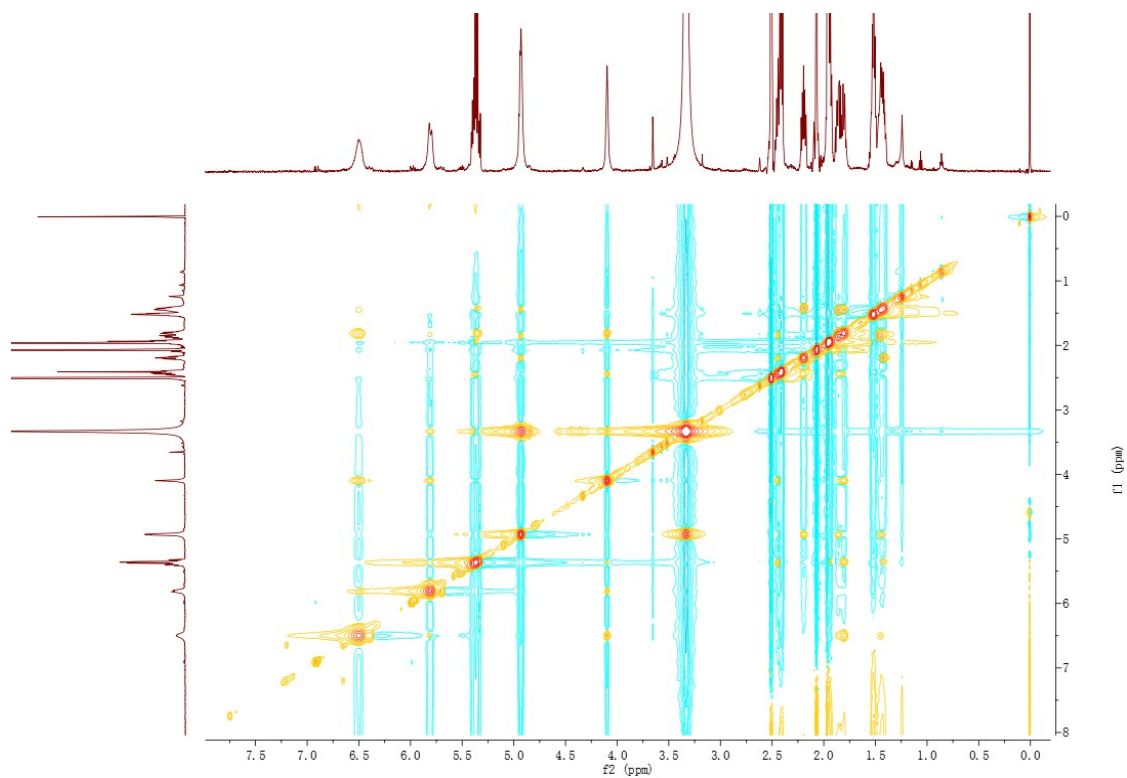

Figure S13 parts expand

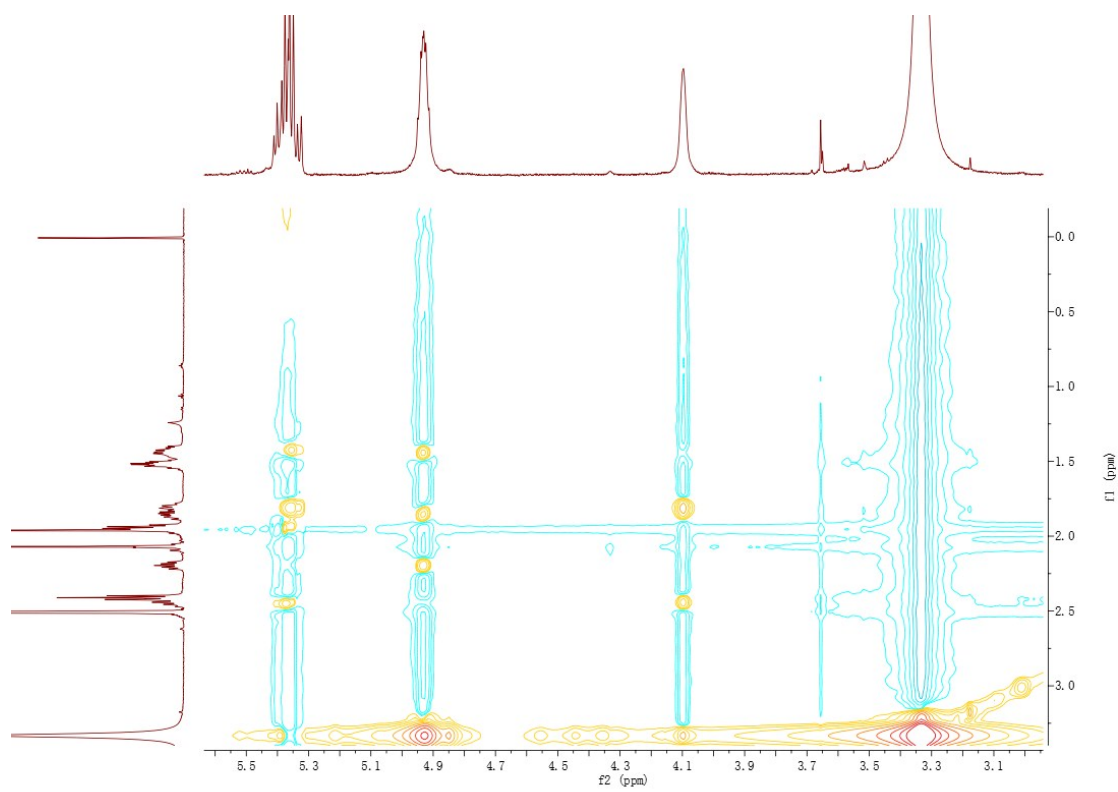

Figure S14. HRESIMS spectrum of 2

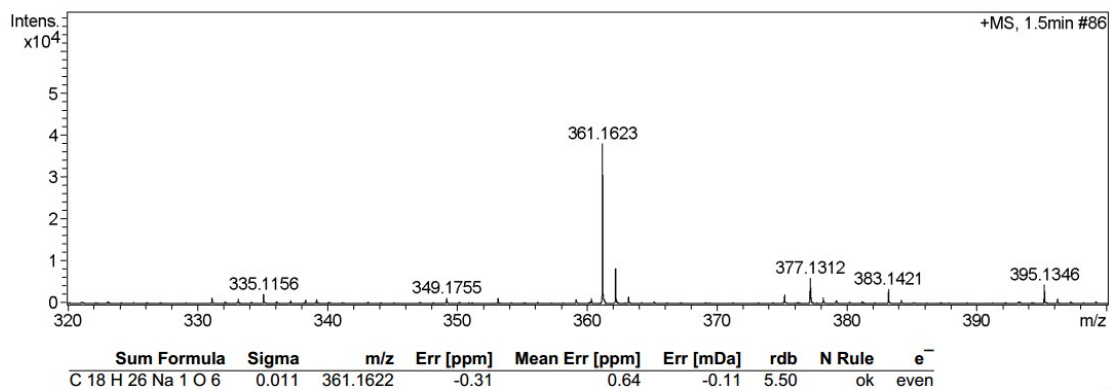

Figure S15. <sup>1</sup>H NMR (600 MHz, methanol-d<sub>4</sub>) spectrum of 3

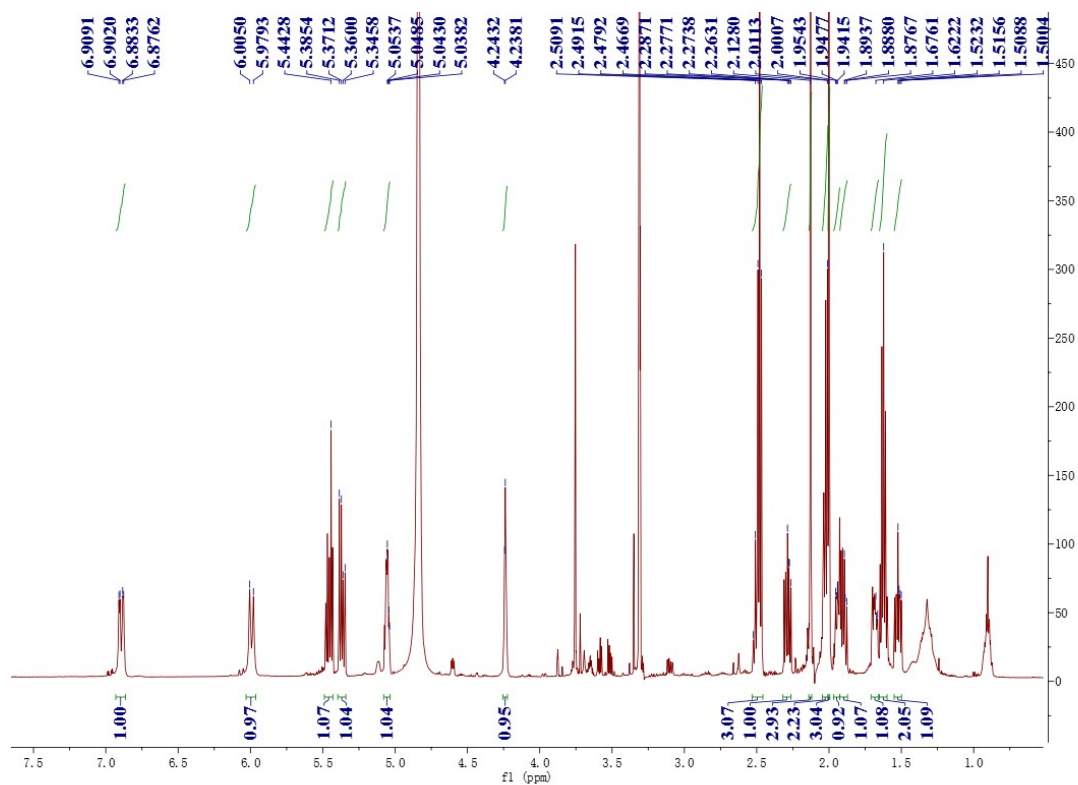



Figure S16.  $^{13}\text{C}$  NMR (150 MHz, methanol- $d_4$ ) spectrum of 3

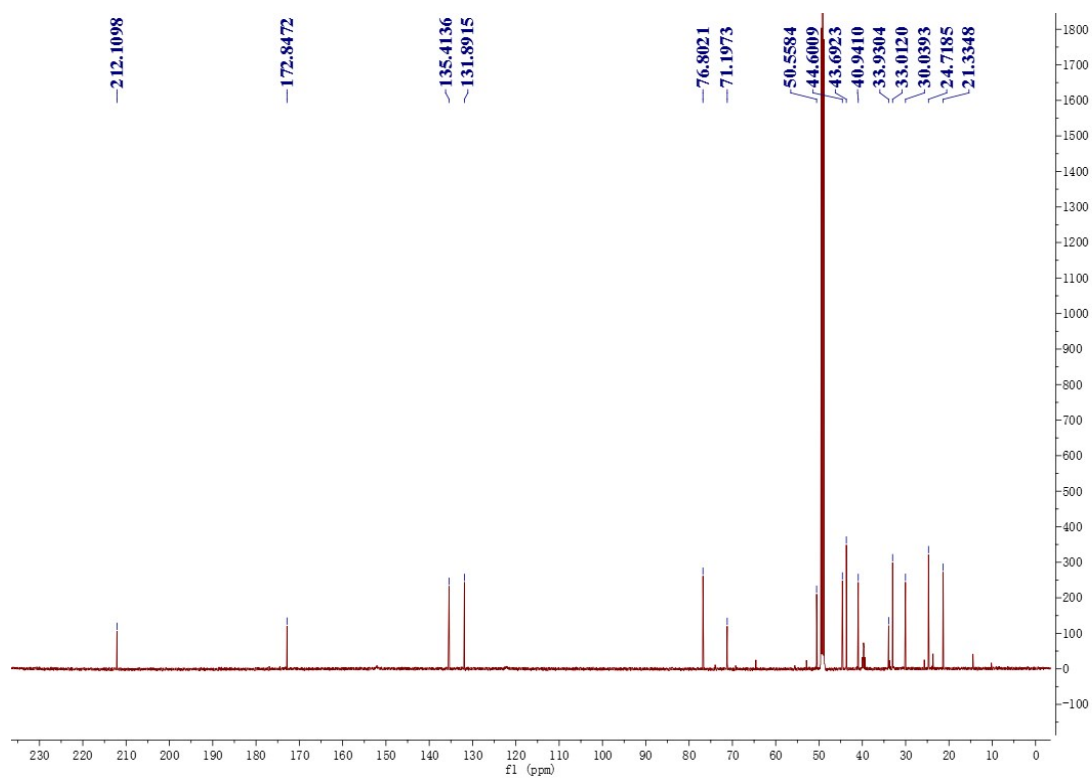

Figure S17.  $^1\text{H}$ - $^1\text{H}$  COSY spectrum of 3 in methanol- $d_4$

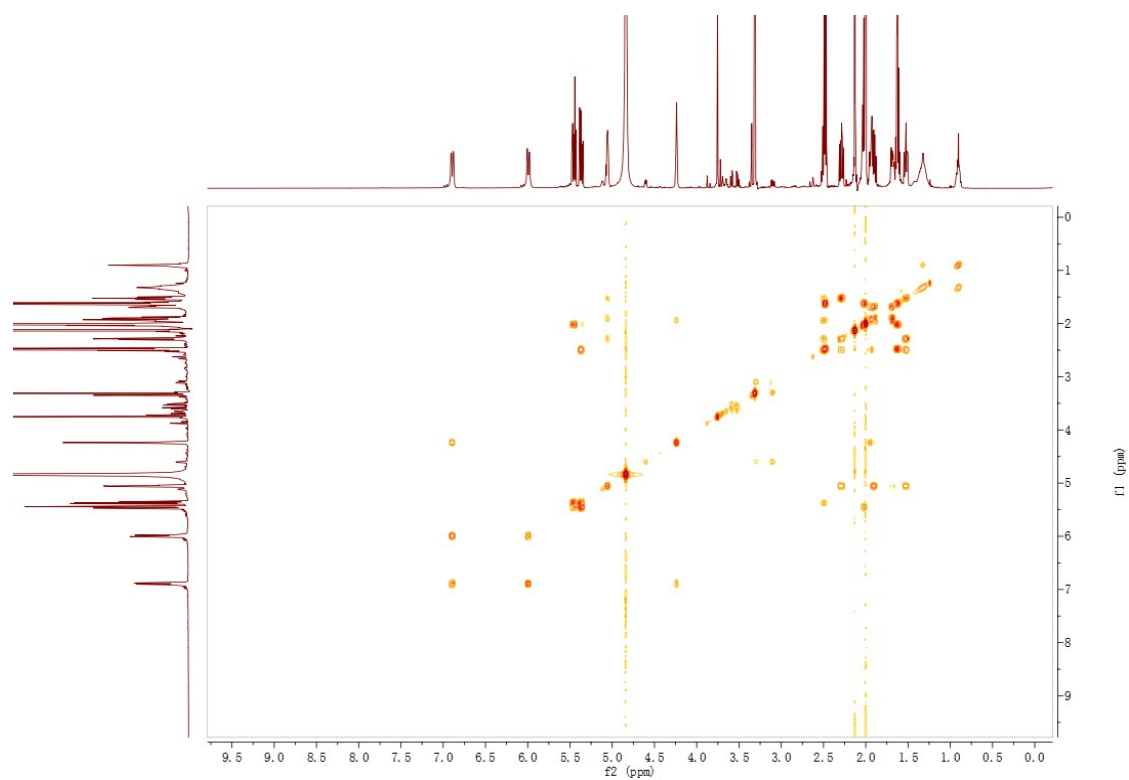

Figure S18. HSQC spectrum of 3 in methanol-d4

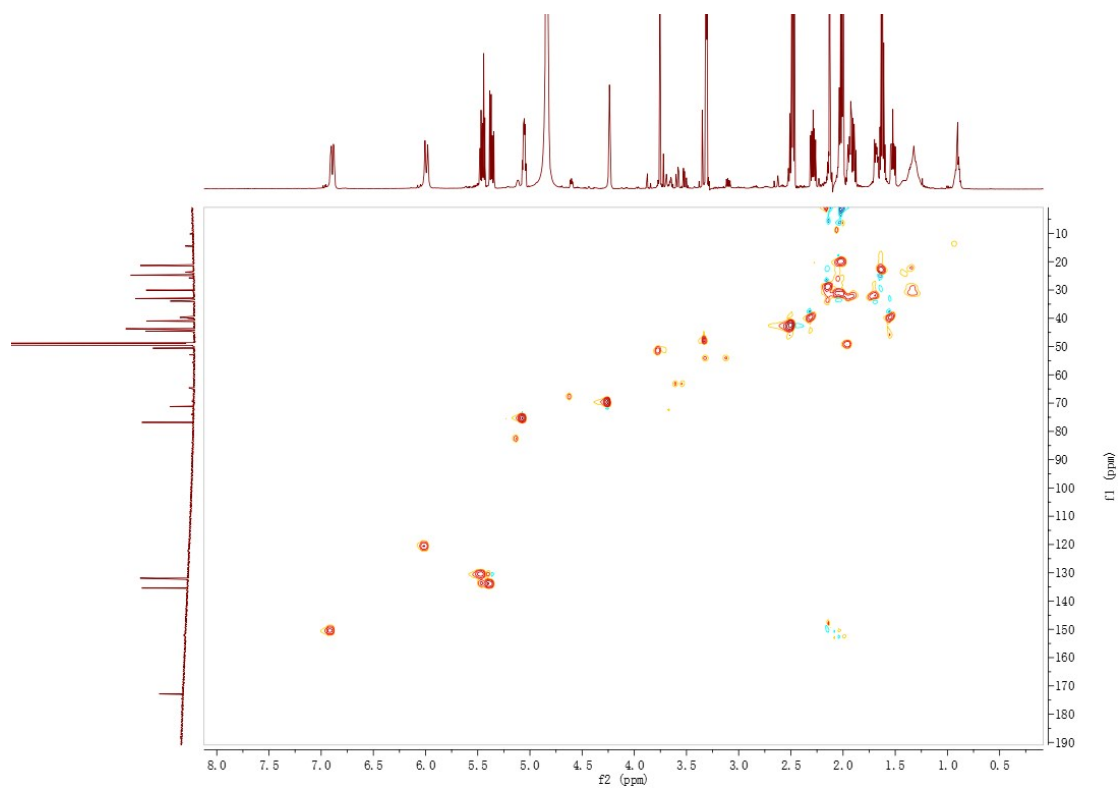

Figure S19. HMBC spectrum of 3 in methanol-d4

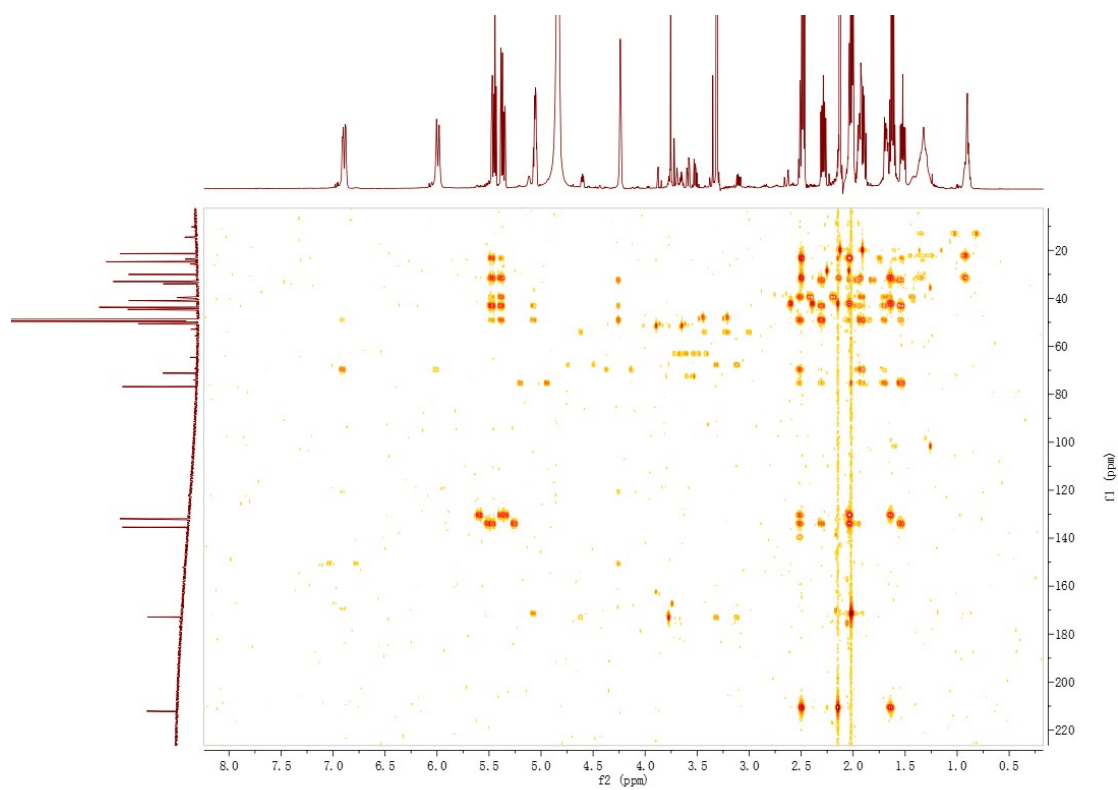

Figure S20. NOSEY spectrum of 3 in DMSO-d6

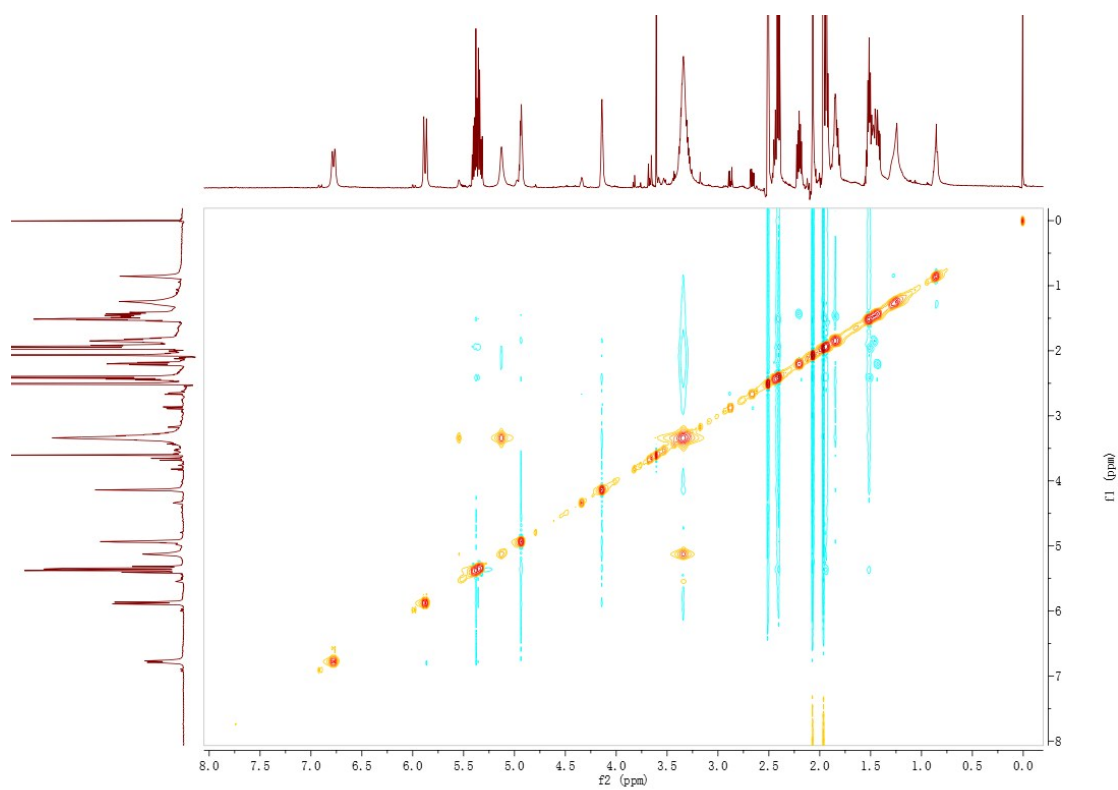

Figure S20 parts expand

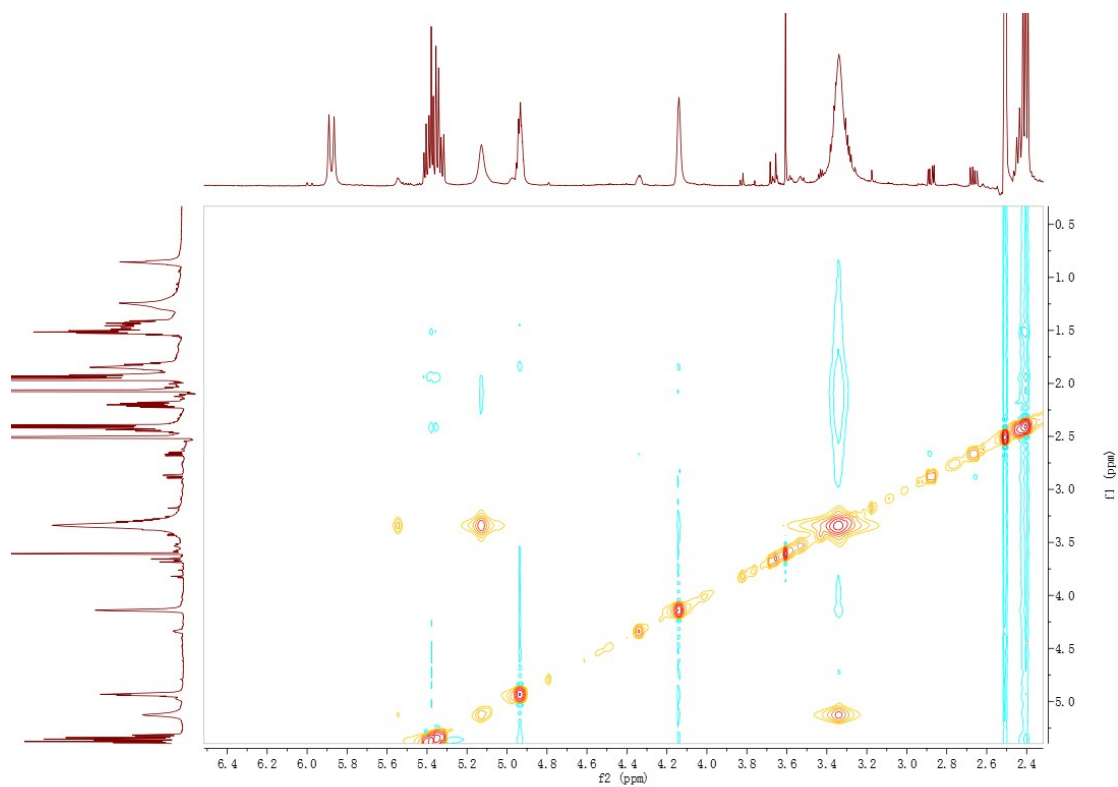

Figure S21. HRESIMS spectrum of 3

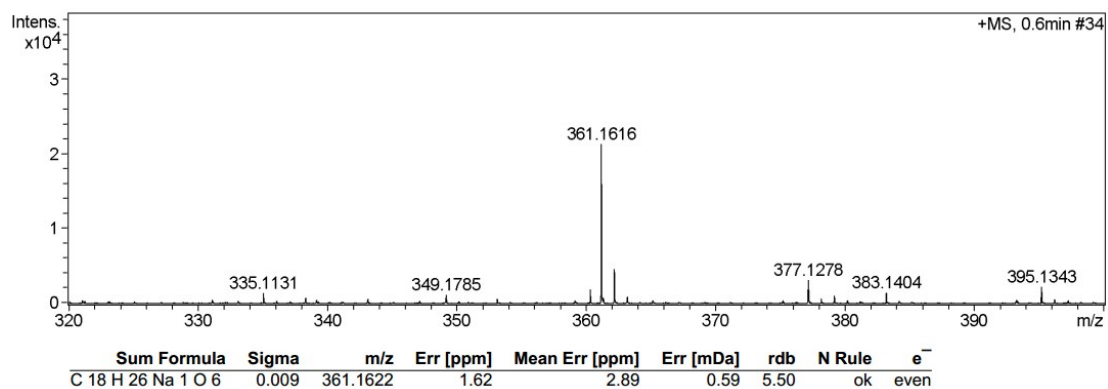

Figure S22. <sup>1</sup>H NMR (600 MHz, methanol-d<sub>4</sub>) spectrum of 4

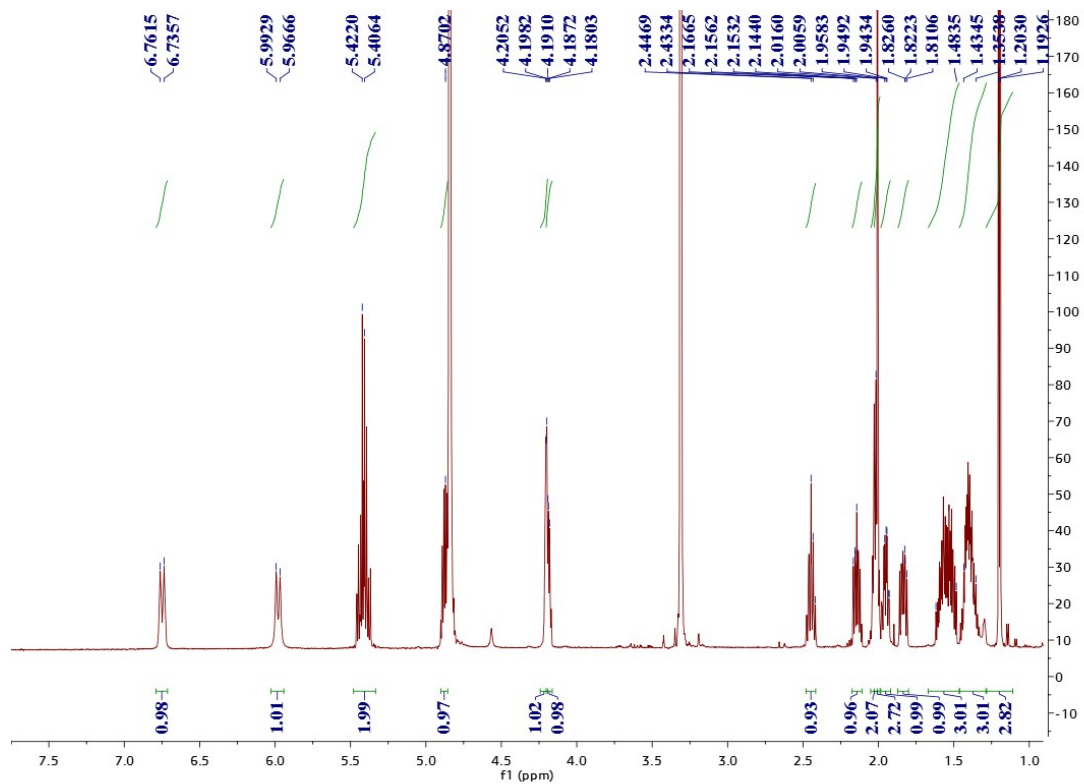

Figure S23.  $^{13}\text{C}$  NMR (150 MHz, methanol- $d_4$ ) spectrum of 4

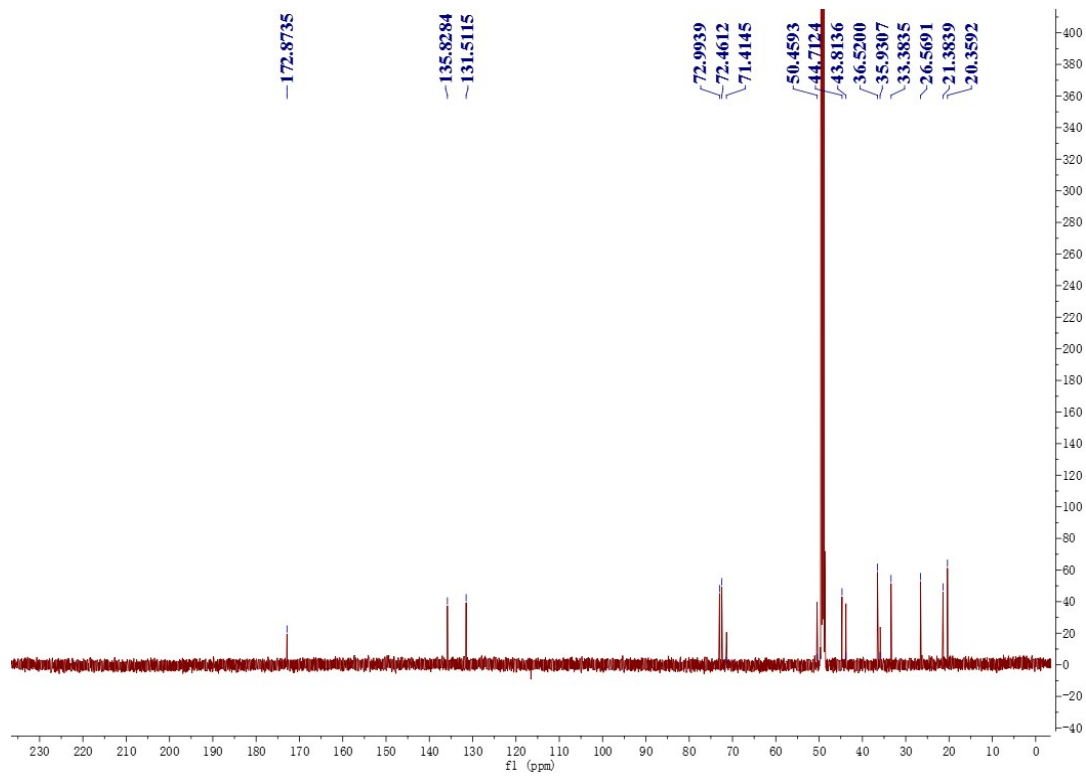

Figure S24.  $^1\text{H}$ - $^1\text{H}$  COSY spectrum of 4 in methanol- $d_4$

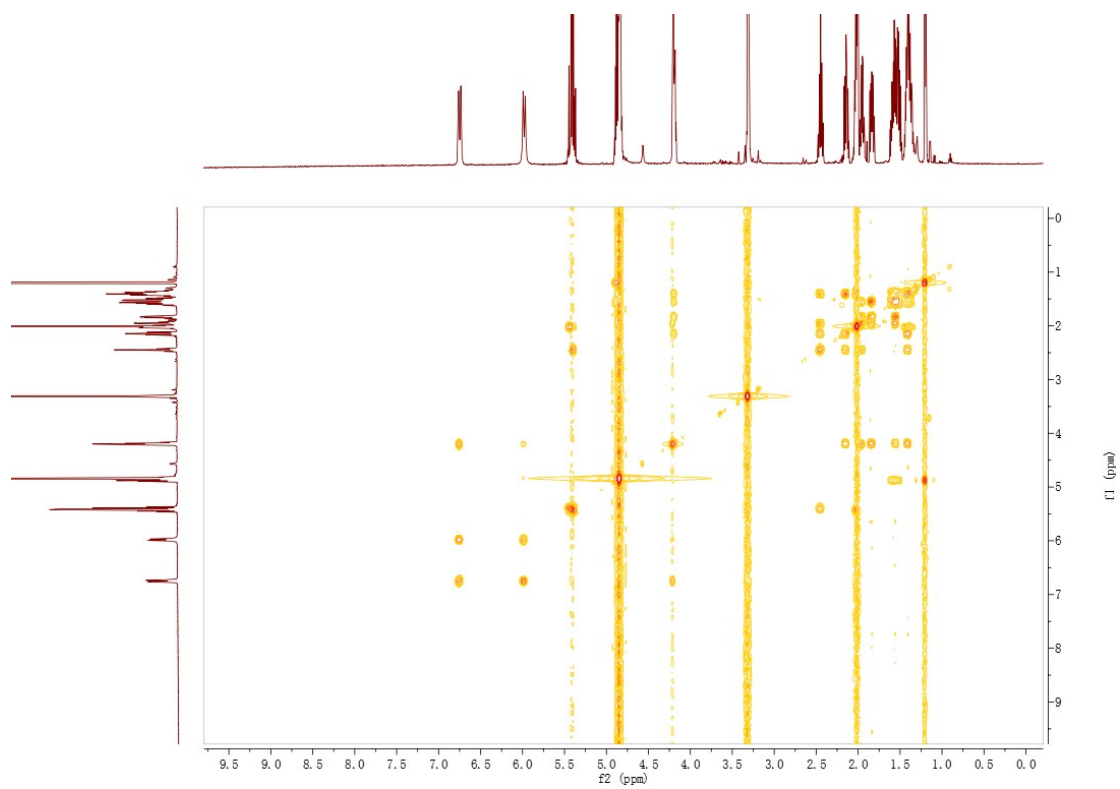



Figure S25. HSQC spectrum of 4 in methanol-d4

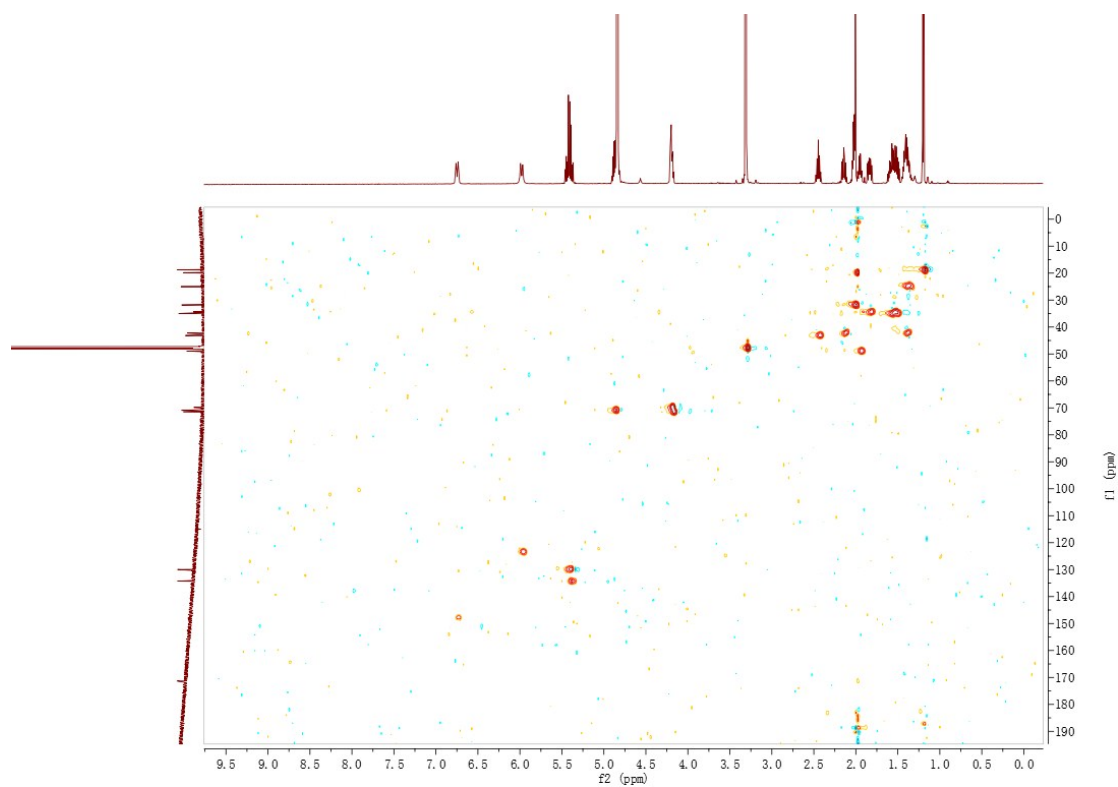

Figure S26. HMBC spectrum of 4 in methanol-d4

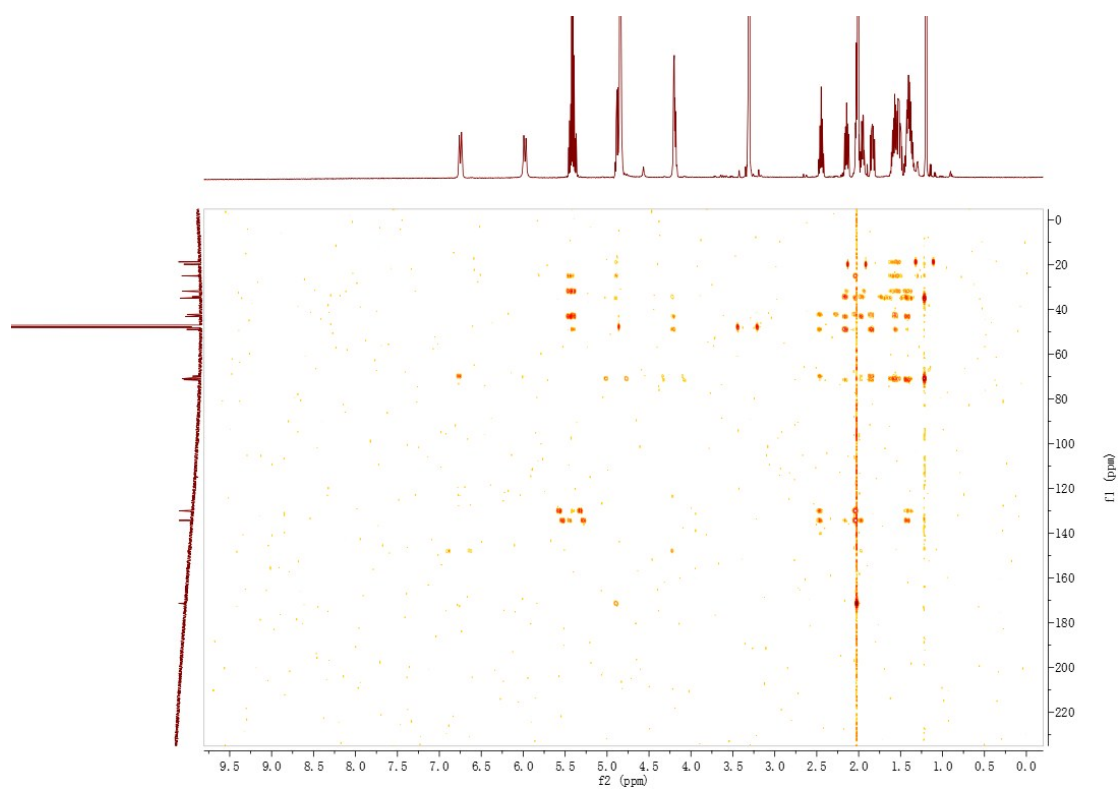

Figure S27. NOSEY spectrum of 4 in DMSO-d6

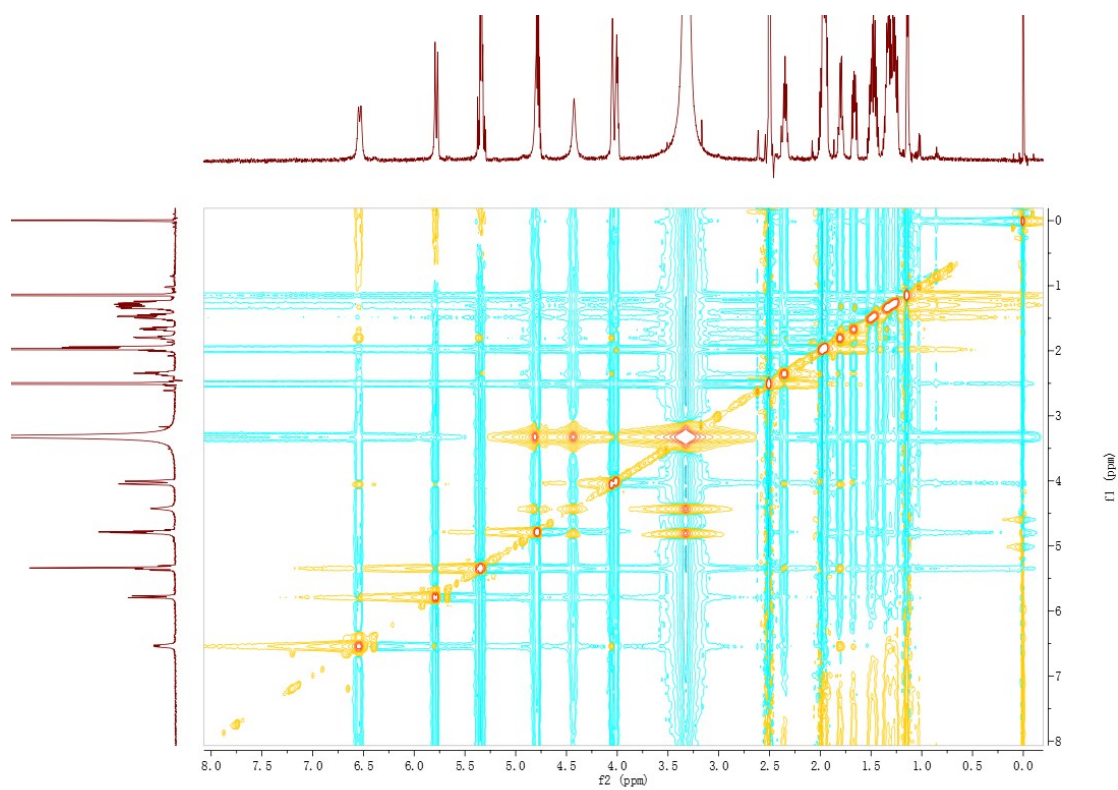

Figure S27 parts expand

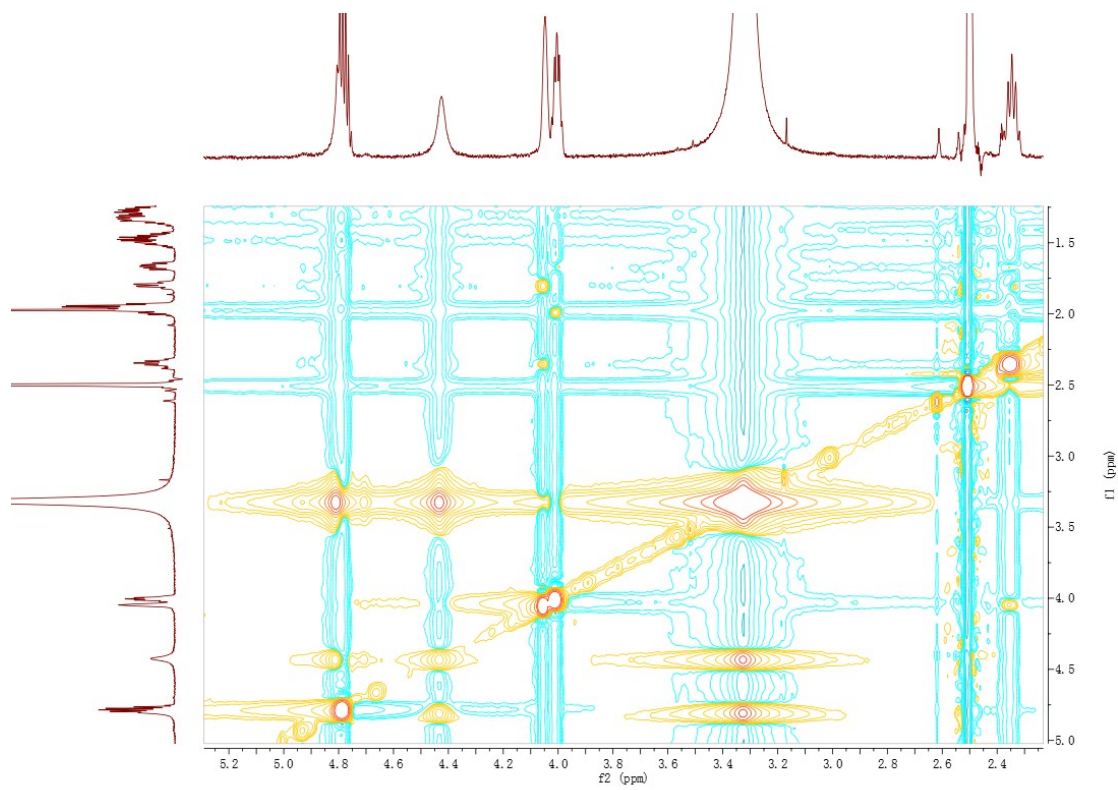

Figure S28. HRESIMS spectrum of 4

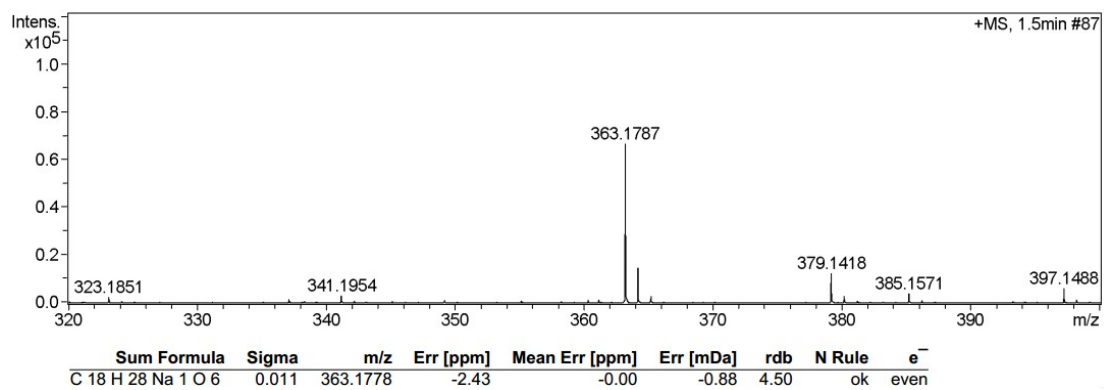

Figure S29. <sup>1</sup>H NMR (600 MHz, methanol-d<sub>4</sub>) spectrum of 5

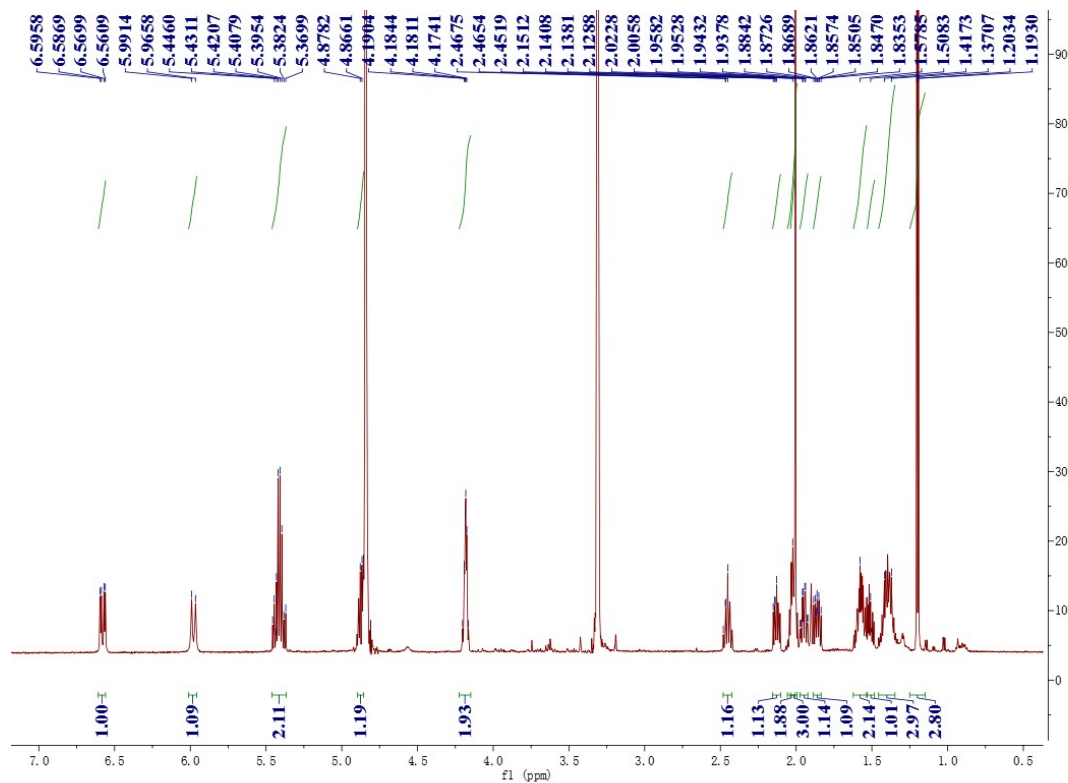

Figure S30.  $^{13}\text{C}$  NMR (150 MHz, methanol- $d_4$ ) spectrum of 5

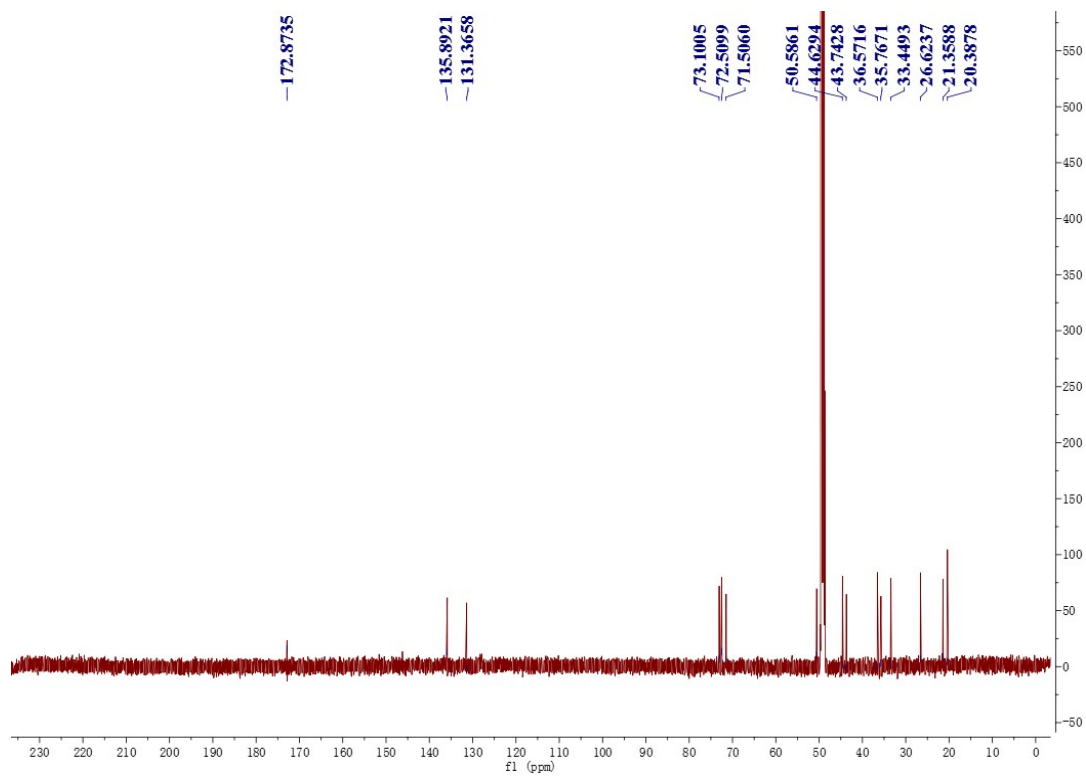

Figure S31.  $^1\text{H}$ - $^1\text{H}$  COSY spectrum of 5 in methanol- $d_4$

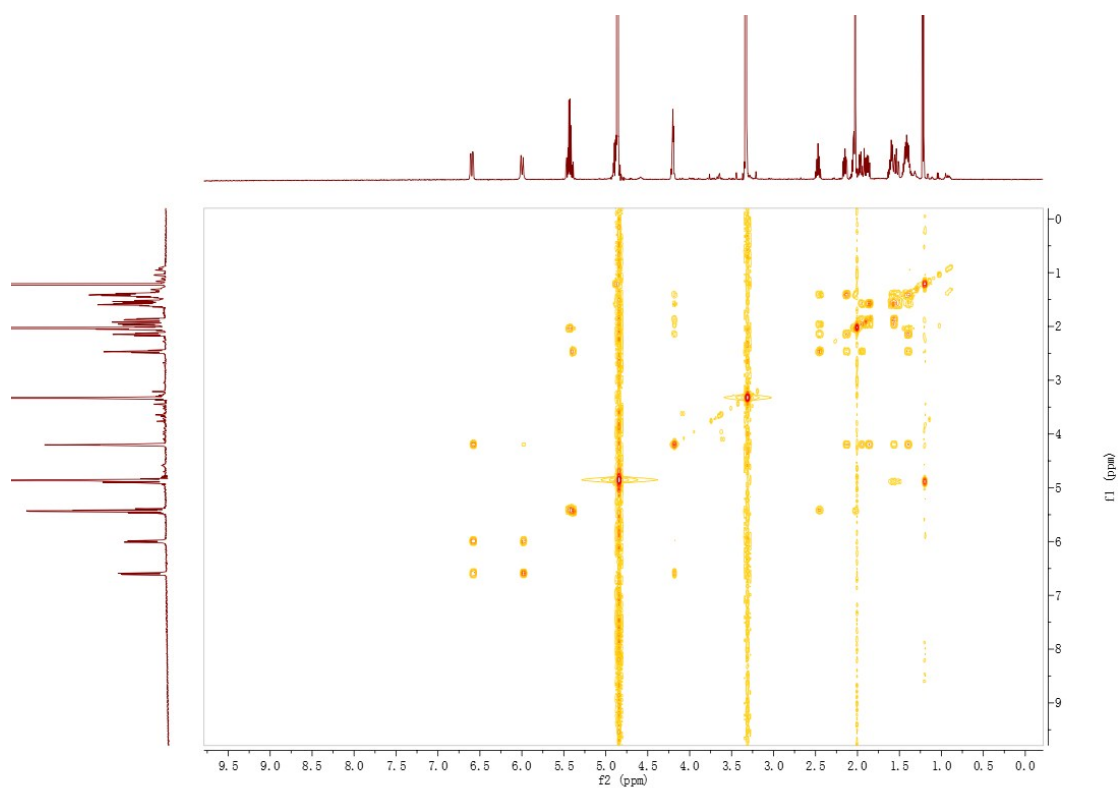

Figure S32. HSQC spectrum of 5 in methanol-d4

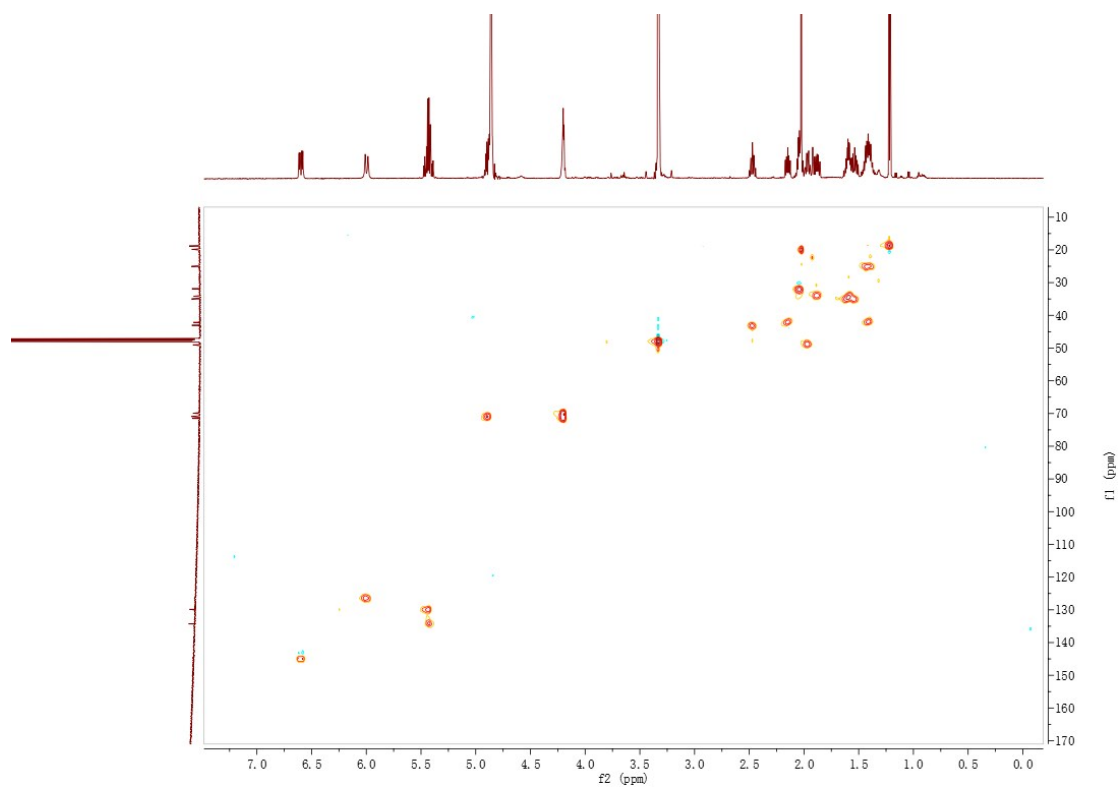

Figure S33. HMBC spectrum of 5 in methanol-d4

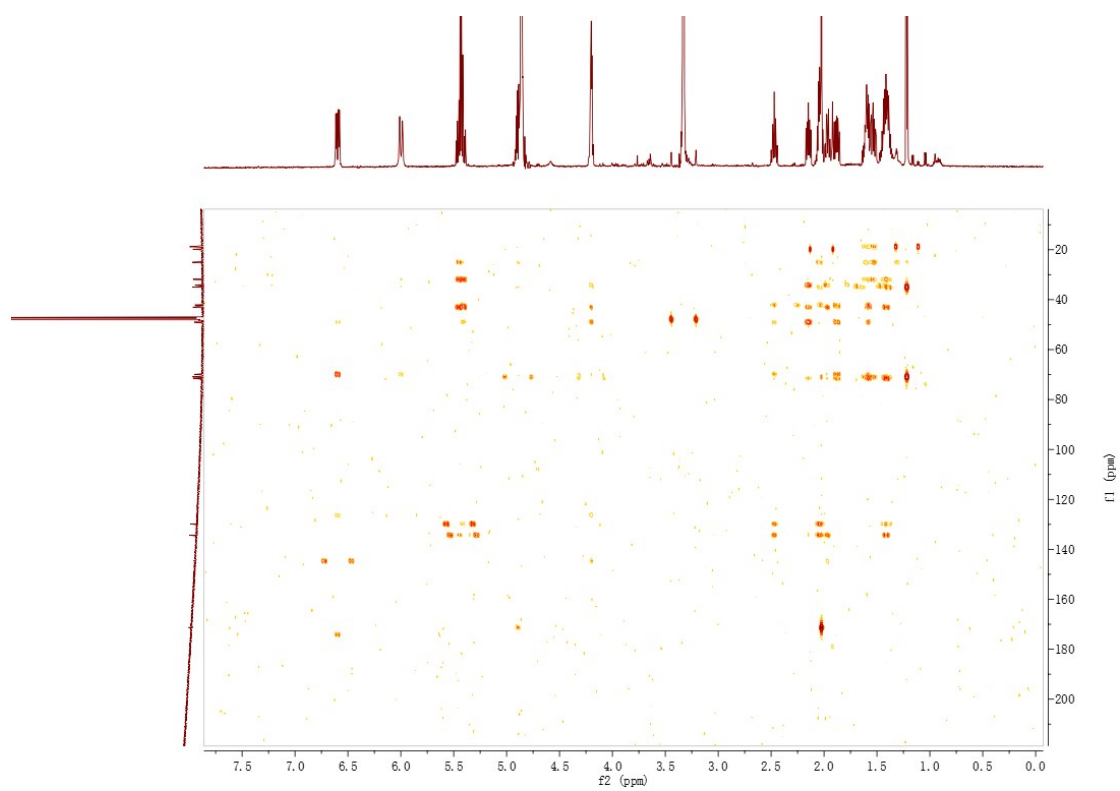



Figure S34. NOSEY spectrum of 5 in DMSO-d6

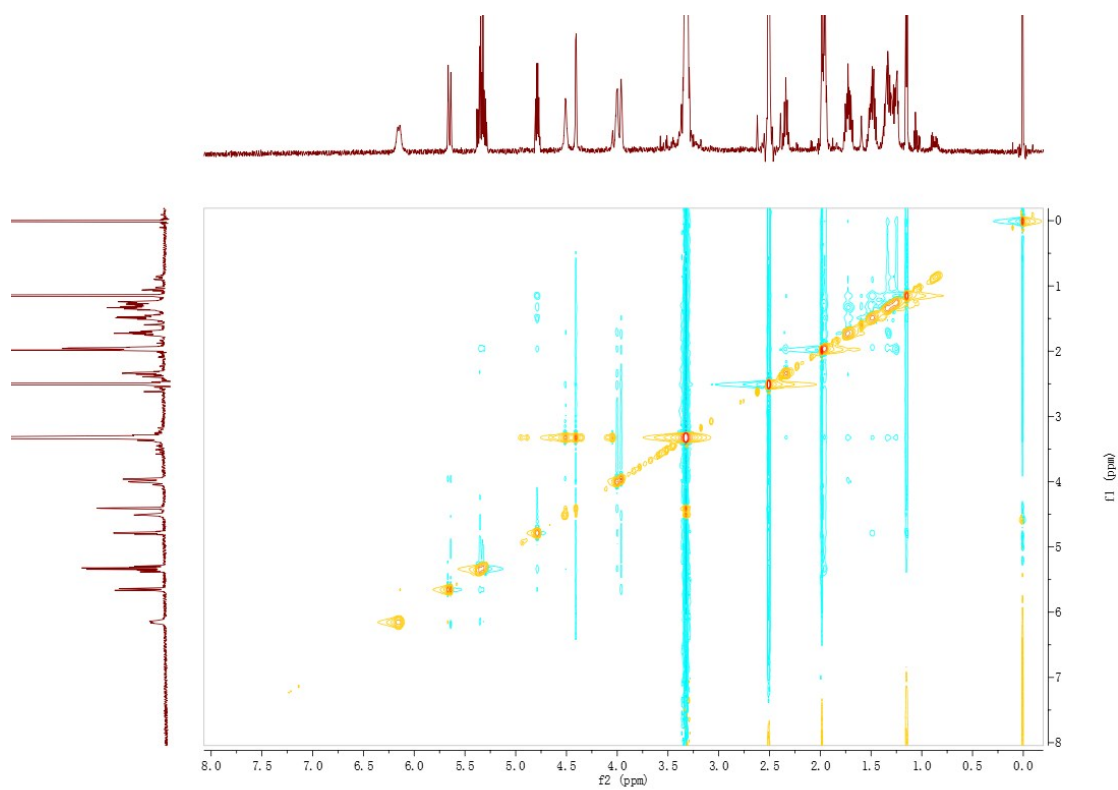

Figure S34 parts expand

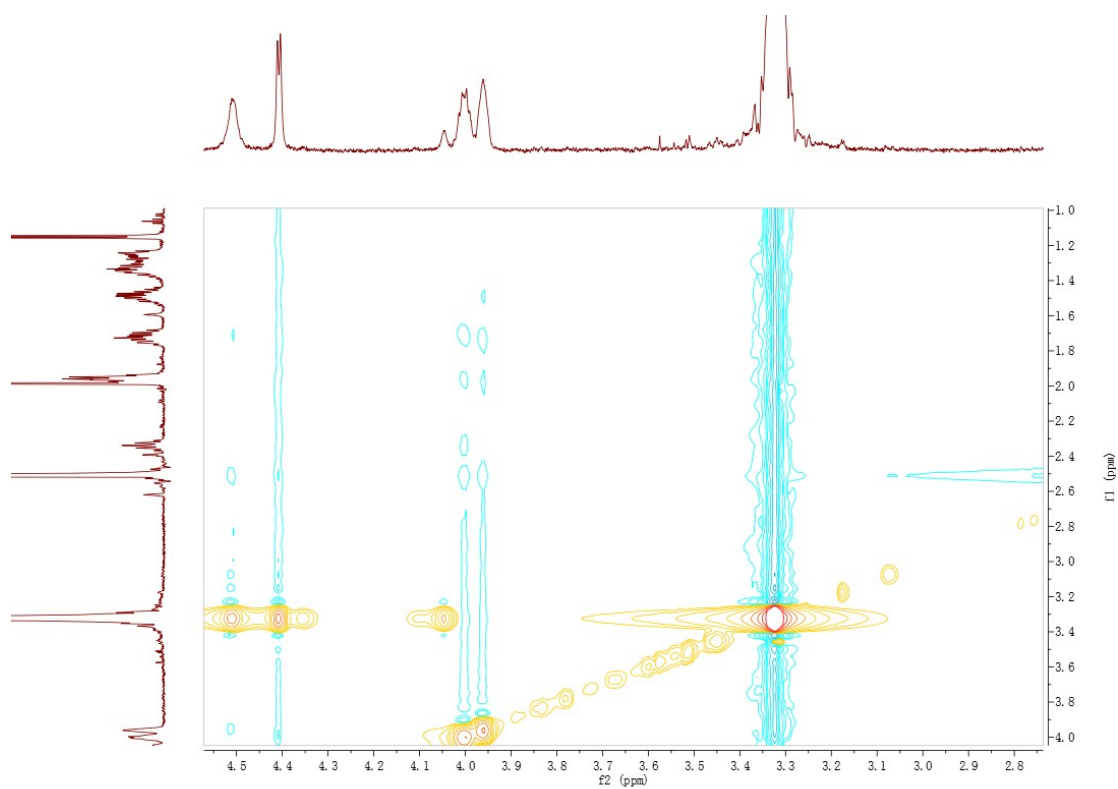

Figure S35. HRESIMS spectrum of 5

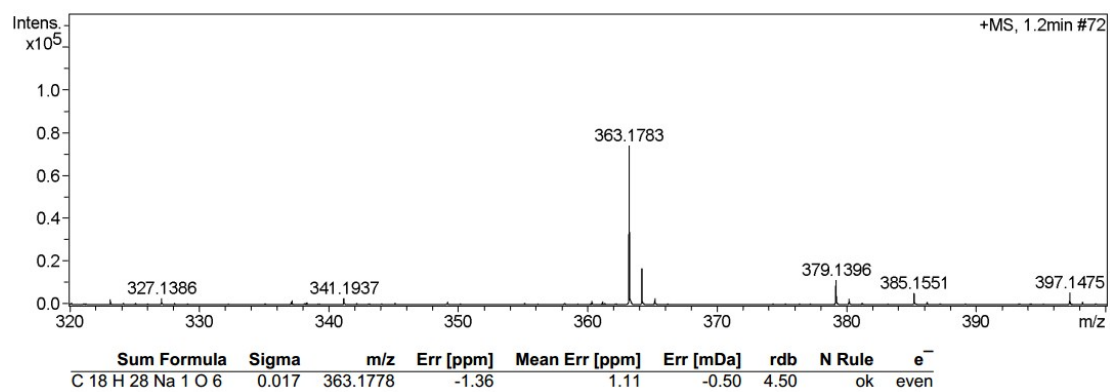

Figure S36. <sup>1</sup>H NMR (600 MHz, chloroform-d) spectrum of 1a-R

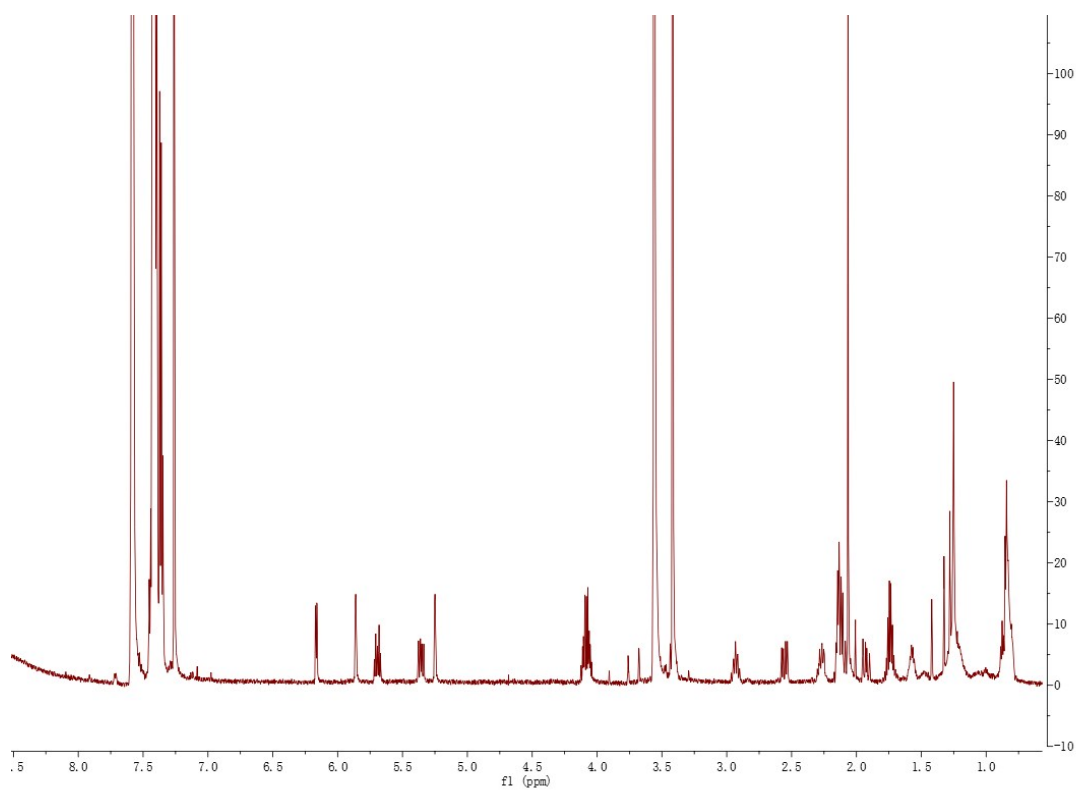

Figure S37.  $^1\text{H}$  NMR (600 MHz, chloroform-d) spectrum of 1b-S

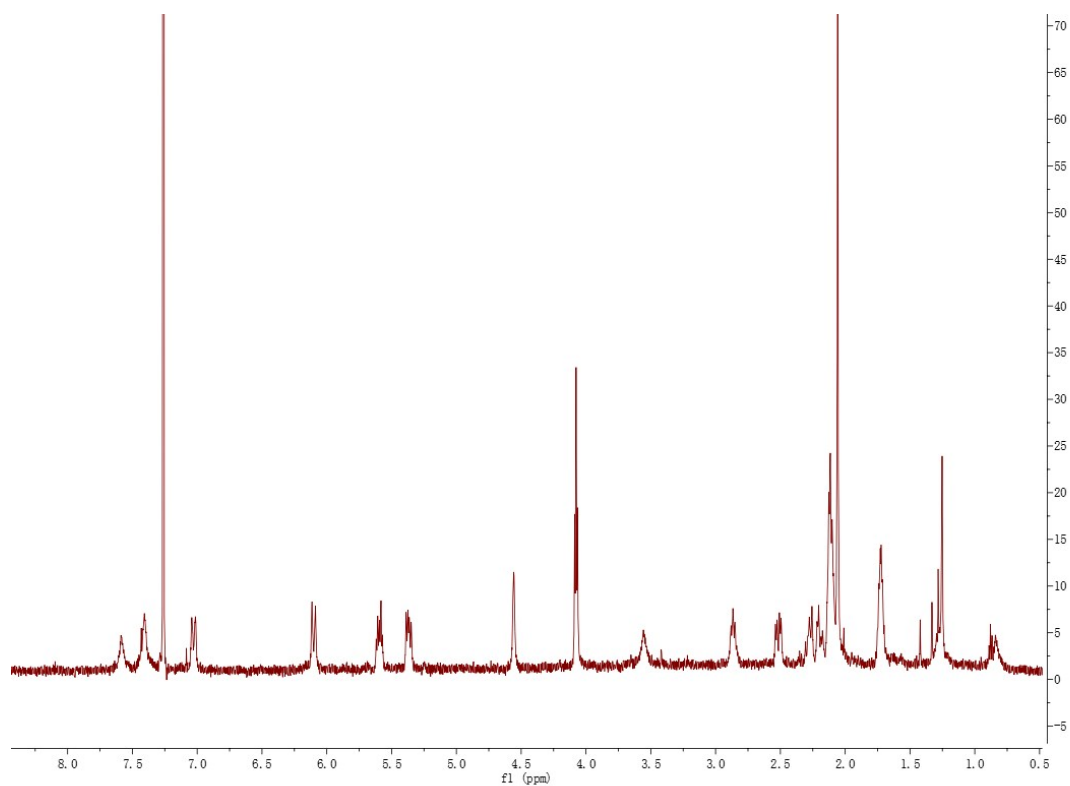

Figure S38.  $^1\text{H}$  NMR (600 MHz, chloroform-d) spectrum of 2a-R

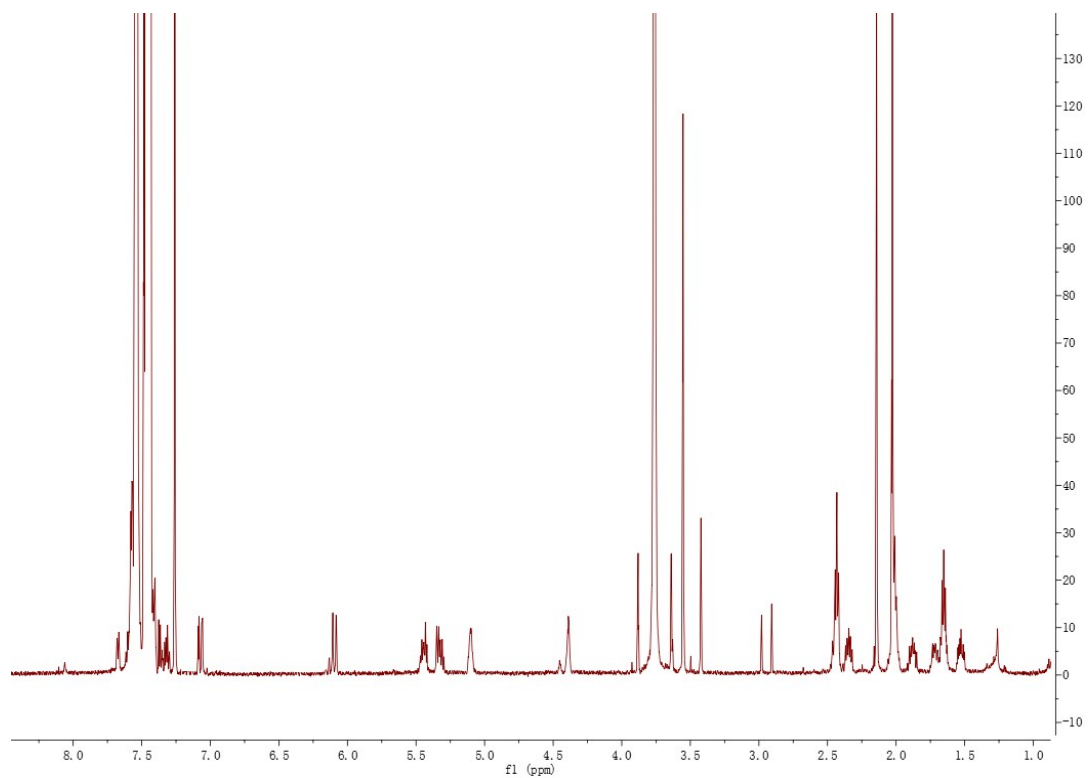

Figure S39.  $^1\text{H}$  NMR (600 MHz, chloroform-d) spectrum of 2b-S

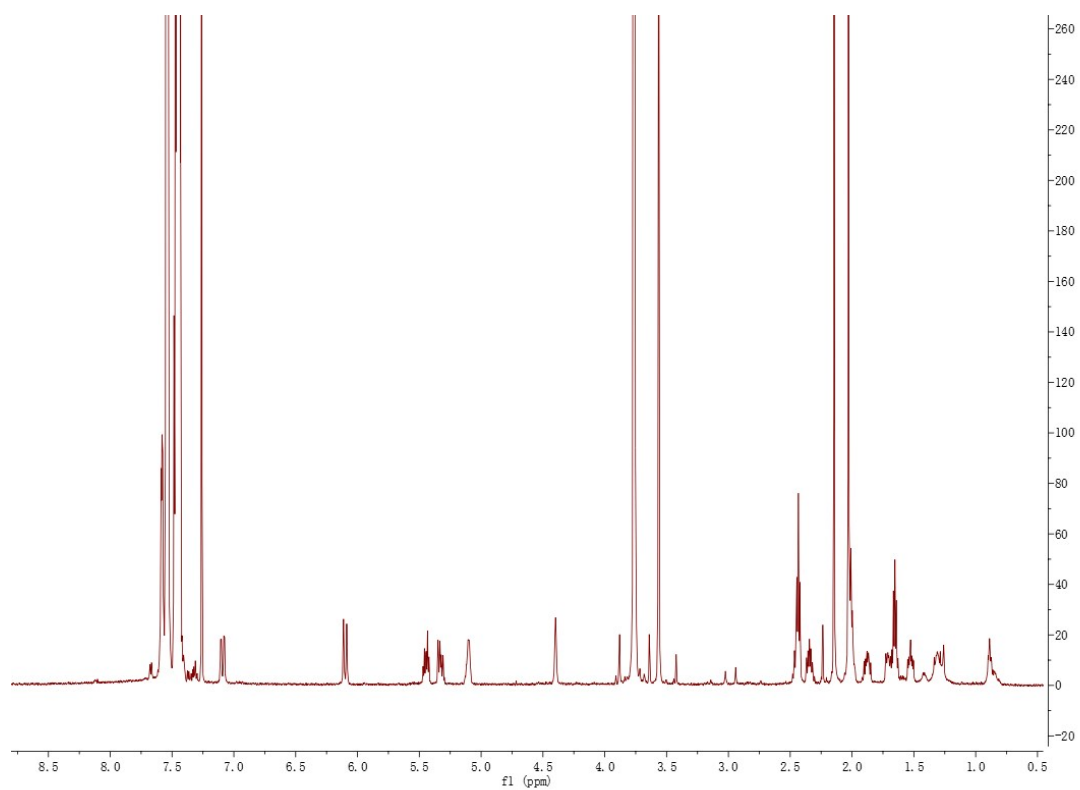

Figure S40.  $^1\text{H}$  NMR (600 MHz, chloroform-d) spectrum of 3a-R

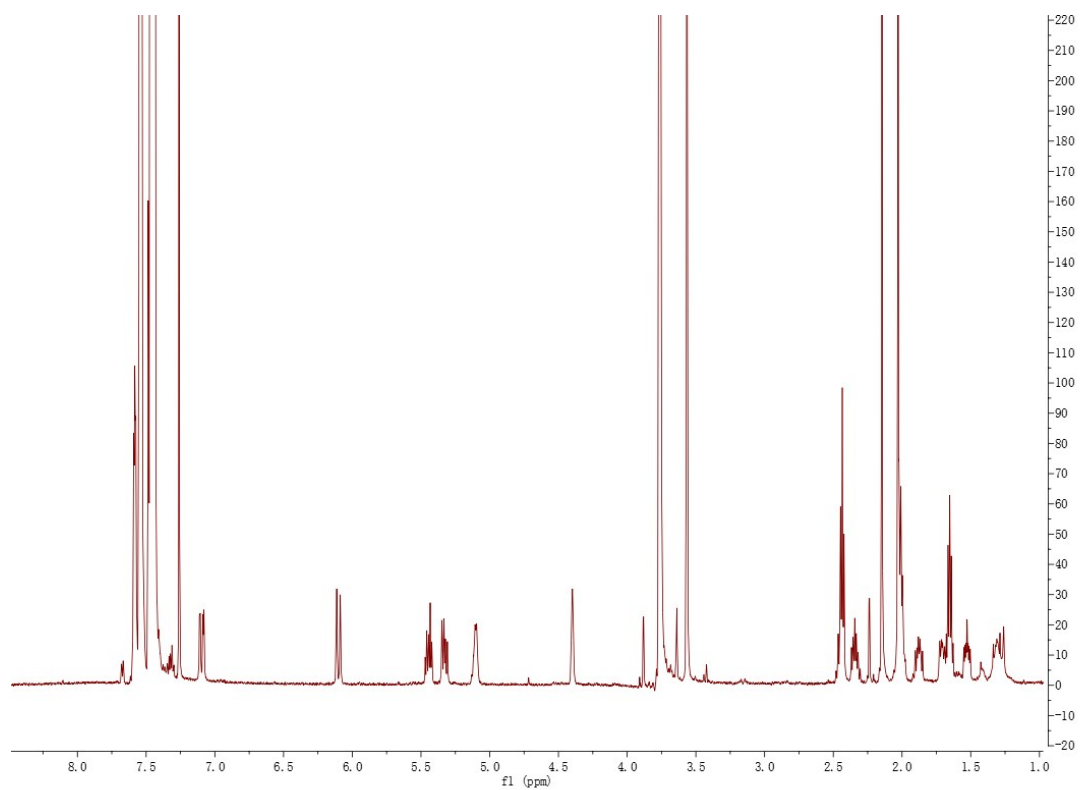

Figure S41.  $^1\text{H}$  NMR (600 MHz, chloroform-d) spectrum of 3b-S

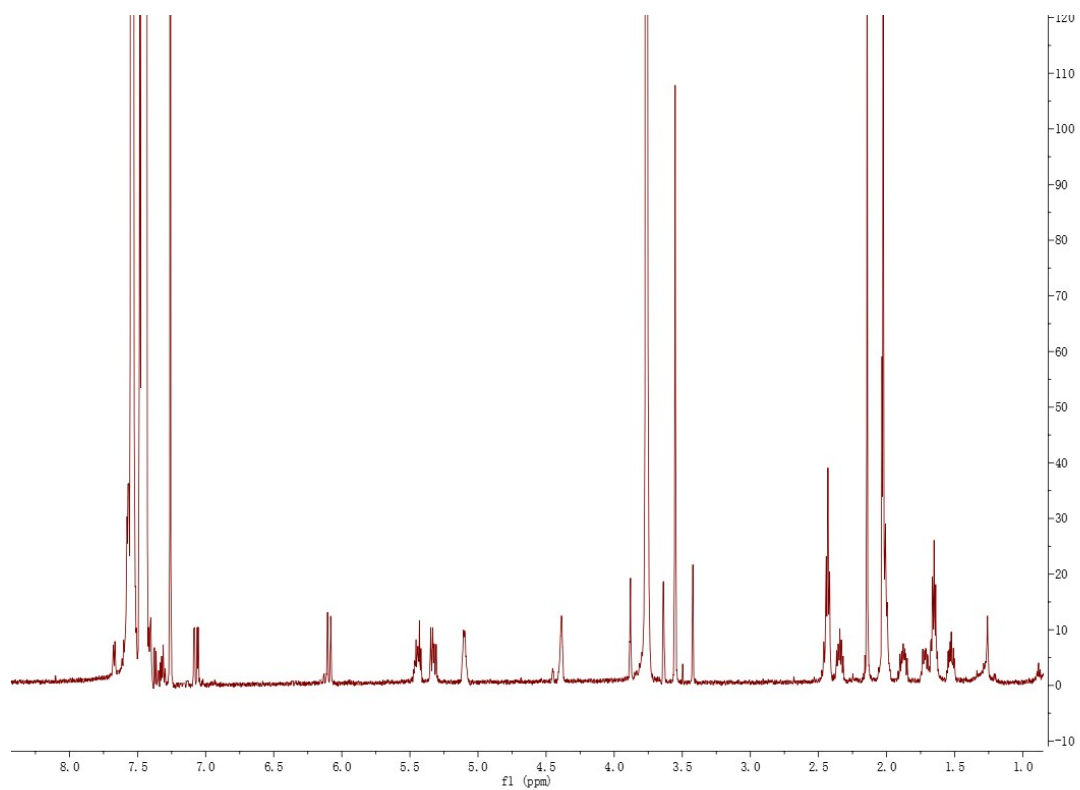

Figure S42.  $^1\text{H}$  NMR (600 MHz, chloroform-d) spectrum of 4a-R

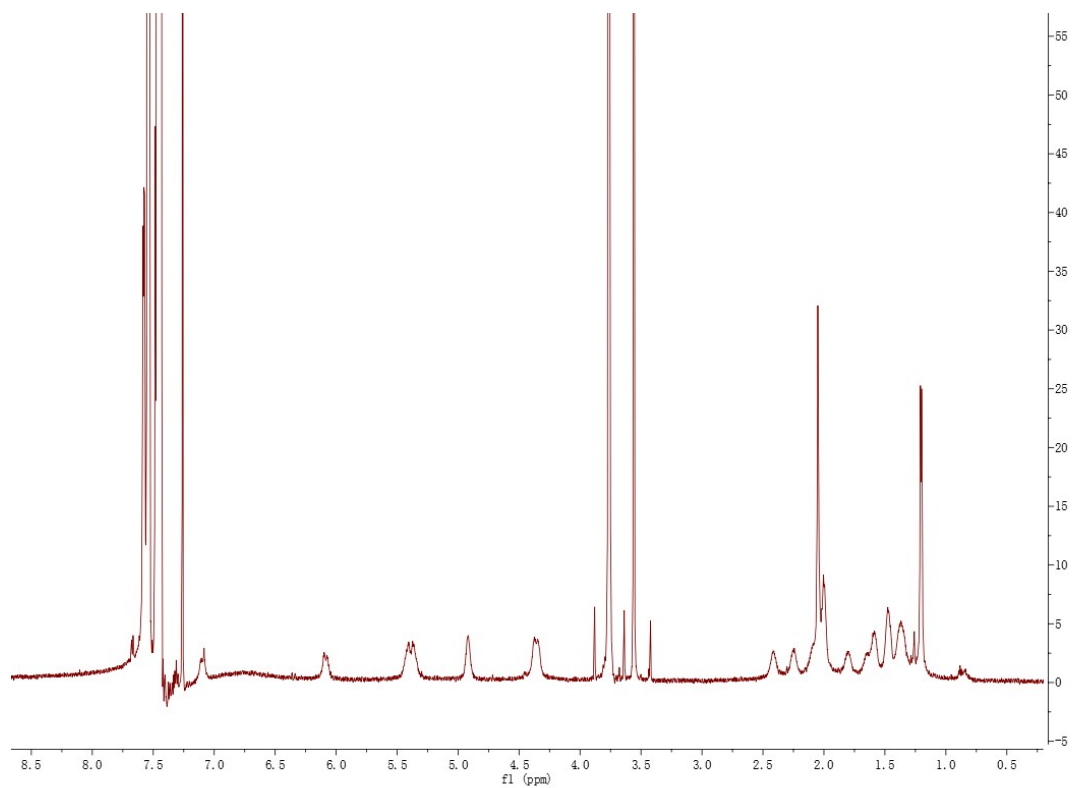



Figure S43.  $^1\text{H}$  NMR (600 MHz, chloroform-d) spectrum of 4b-S

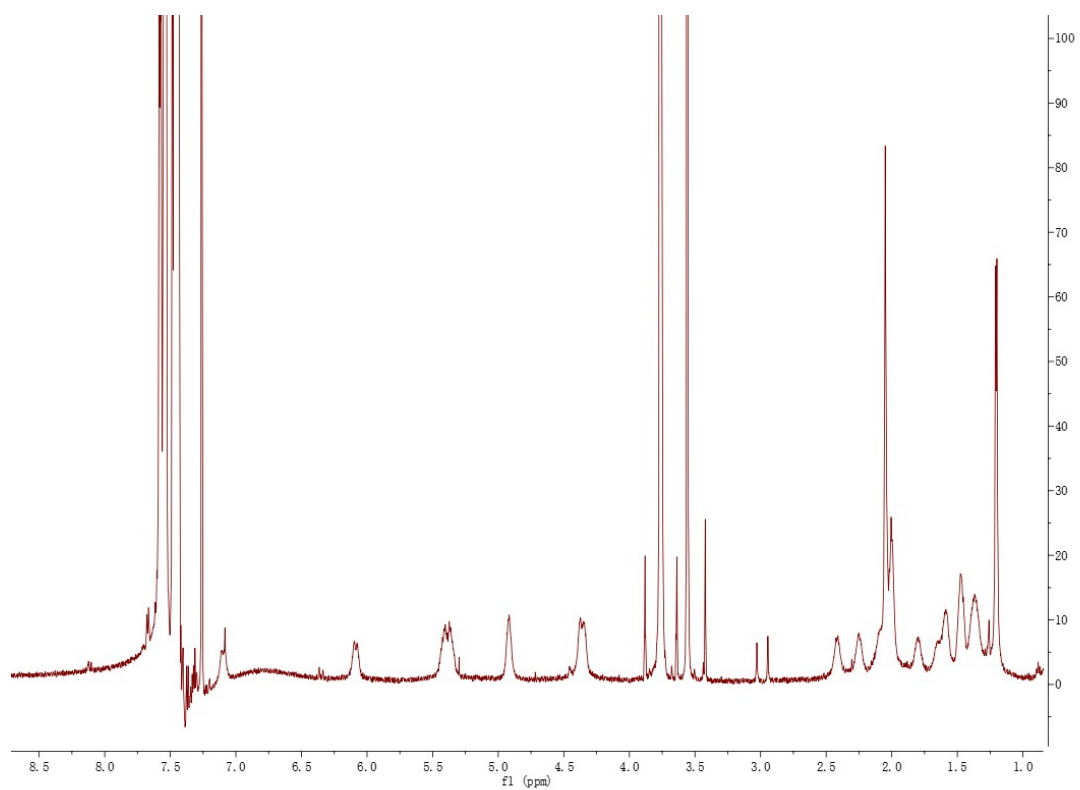

Figure S44.  $^1\text{H}$  NMR (600 MHz, chloroform-d) spectrum of 5a-R

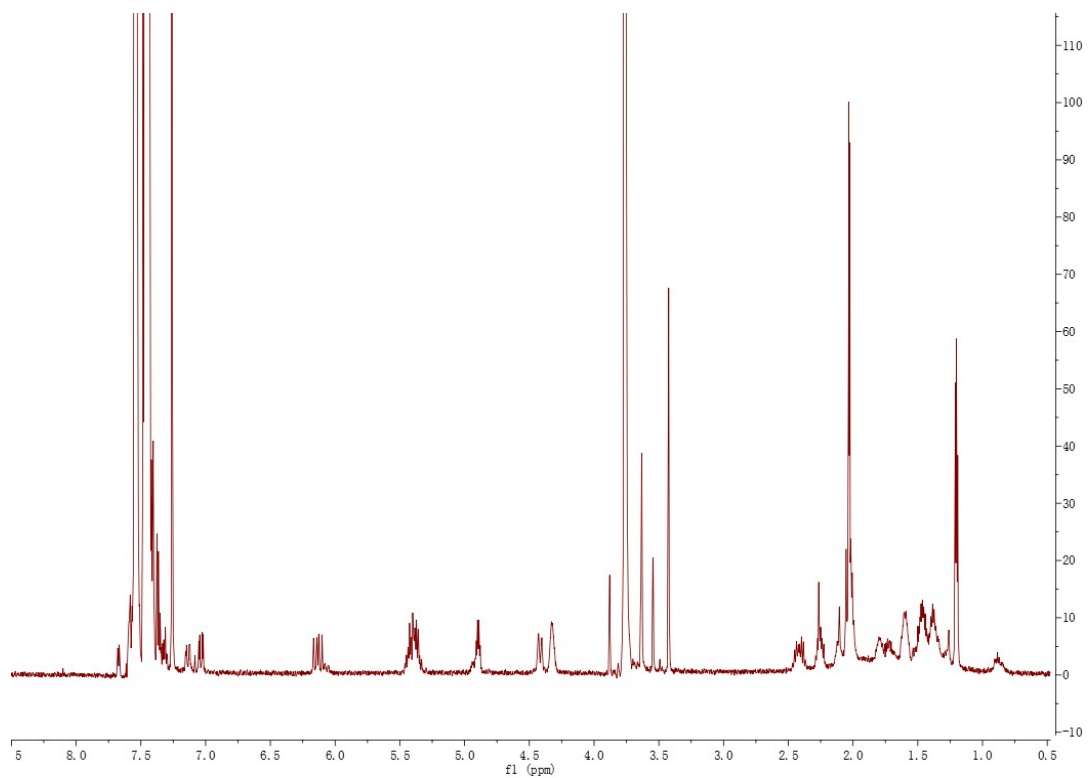

Figure S45.  $^1\text{H}$  NMR (600 MHz, chloroform-d) spectrum of 5b-S

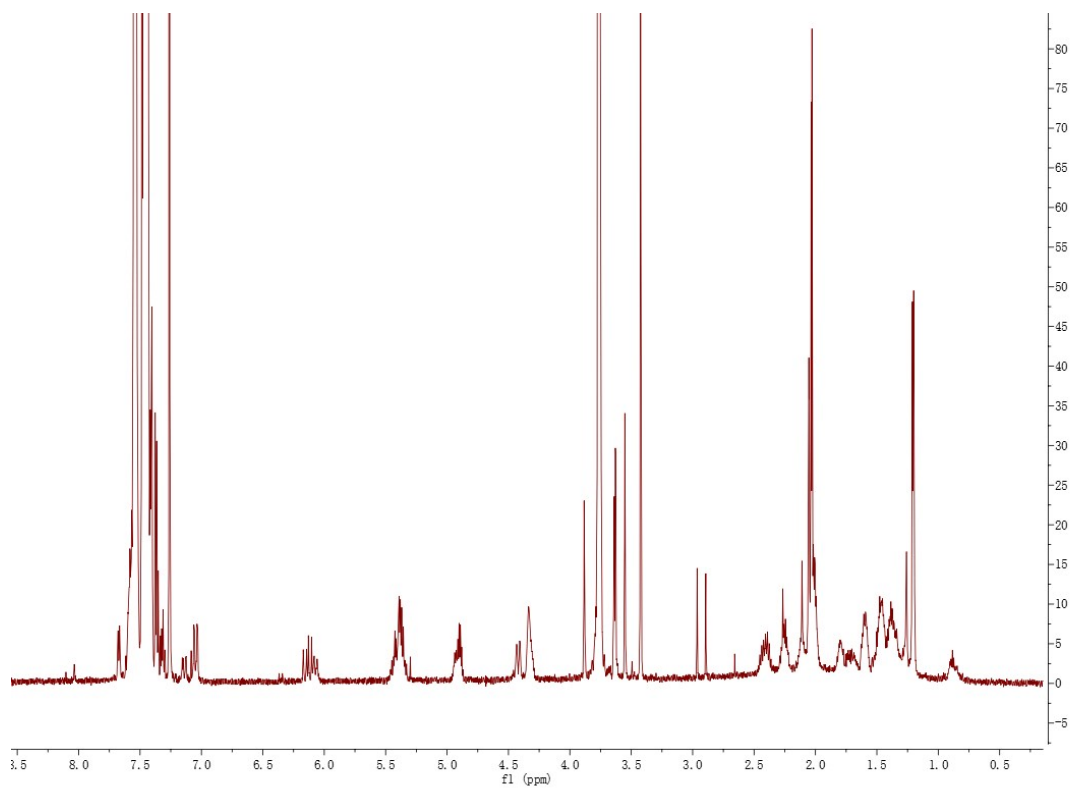

Figure S46-50. IR spectrum of 1,2,3,4,5

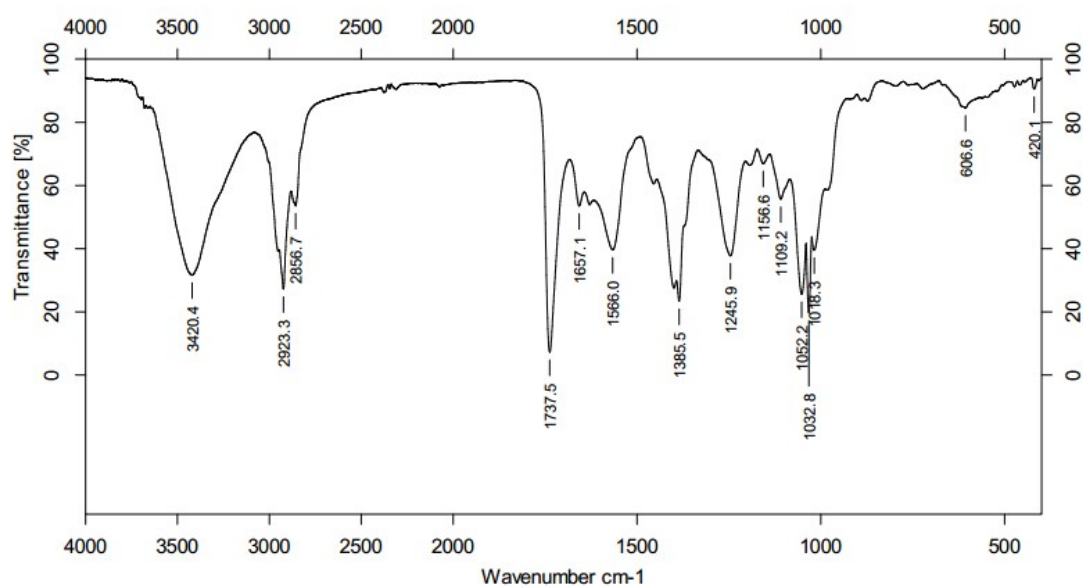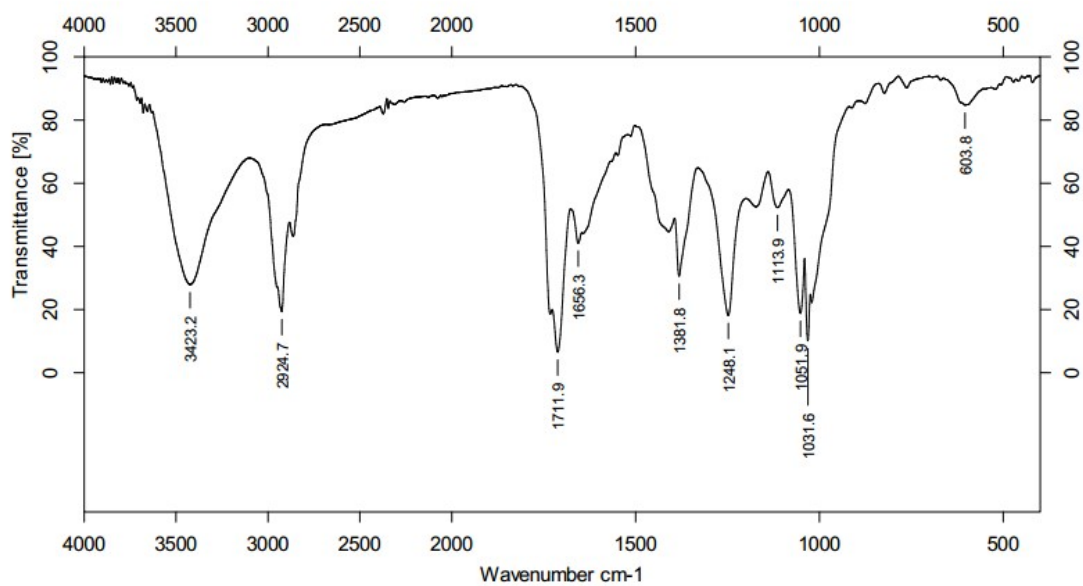

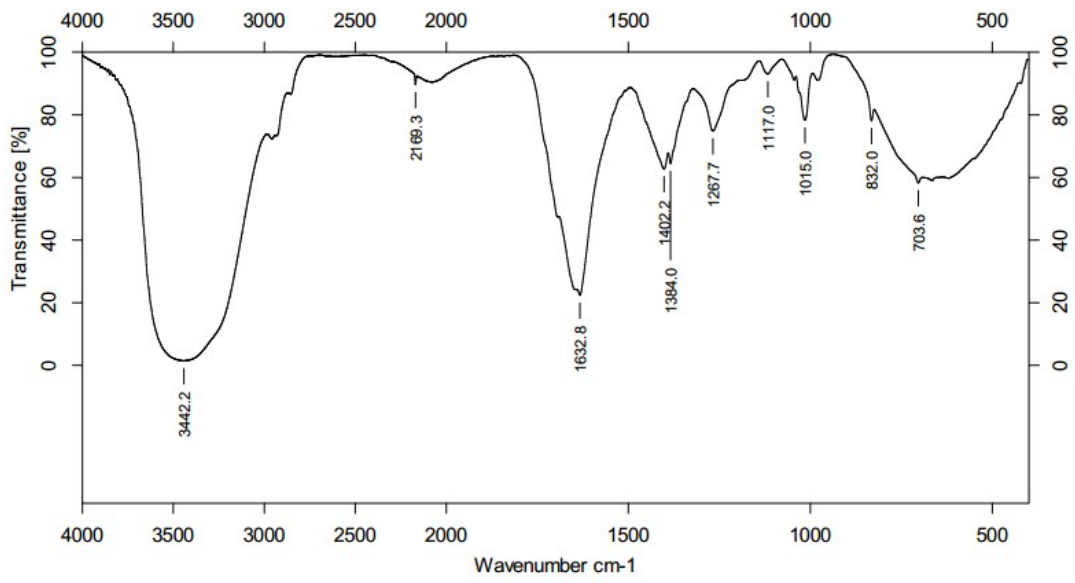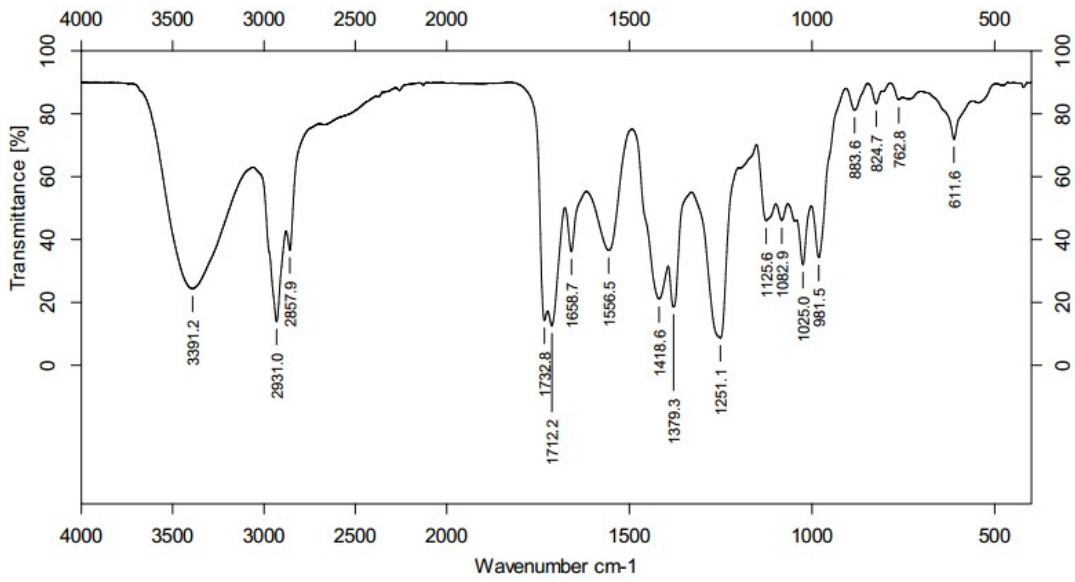

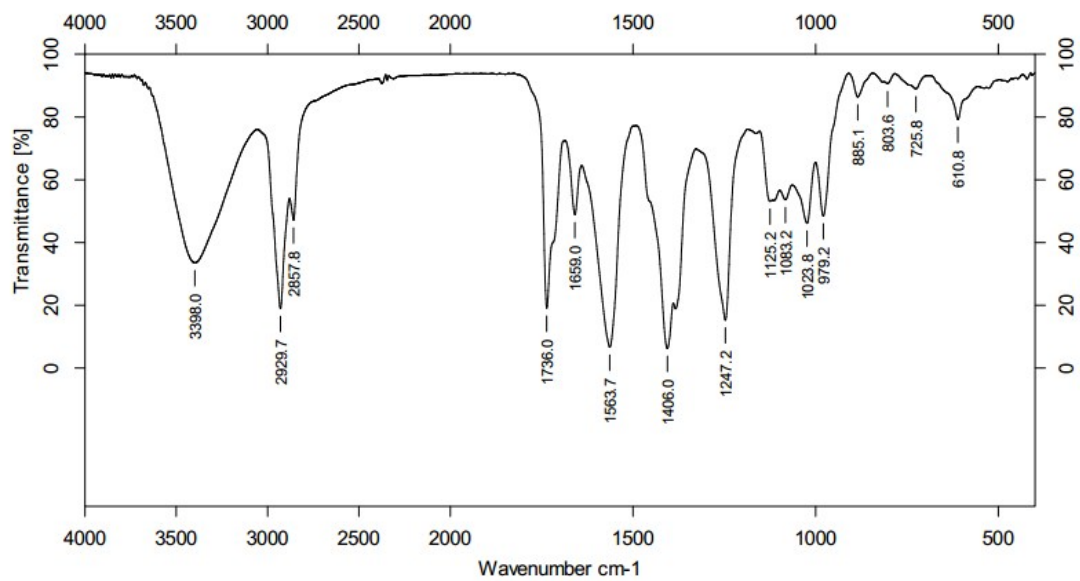

Figure S51 The CD profiles of compounds **1(A)**, **2(B)**, **3(C)**, **4(D)**, **5(E)**

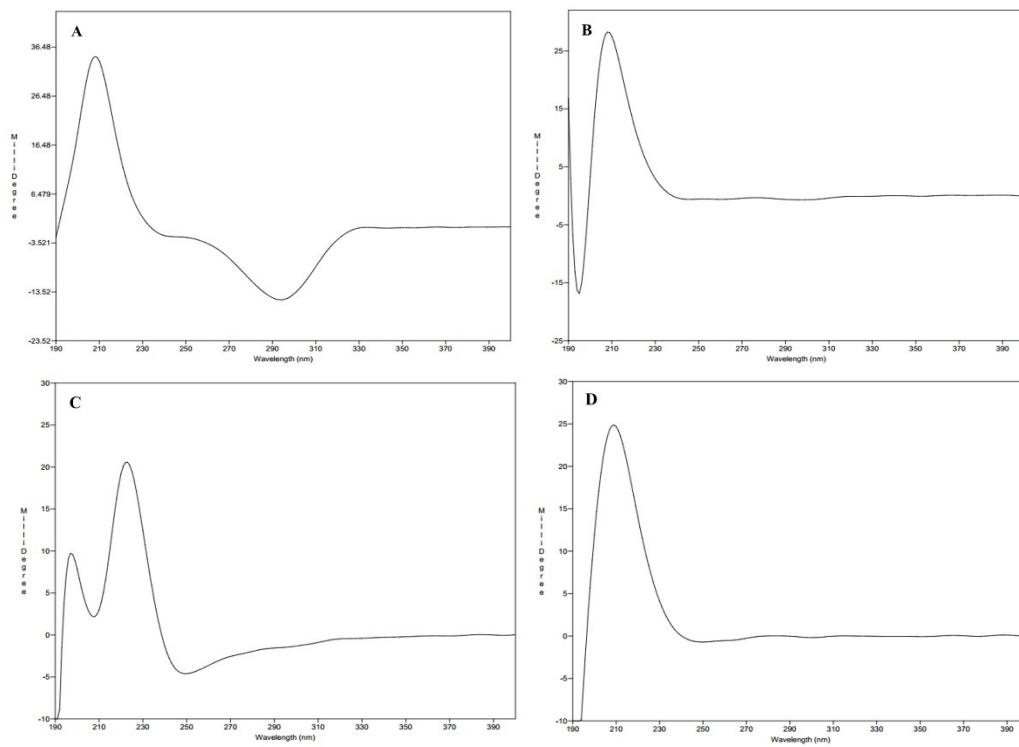

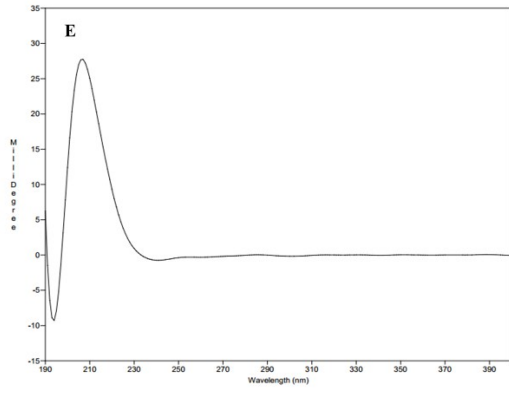

Figure S52 The plausible biosynthetic pathways of compounds 1-7

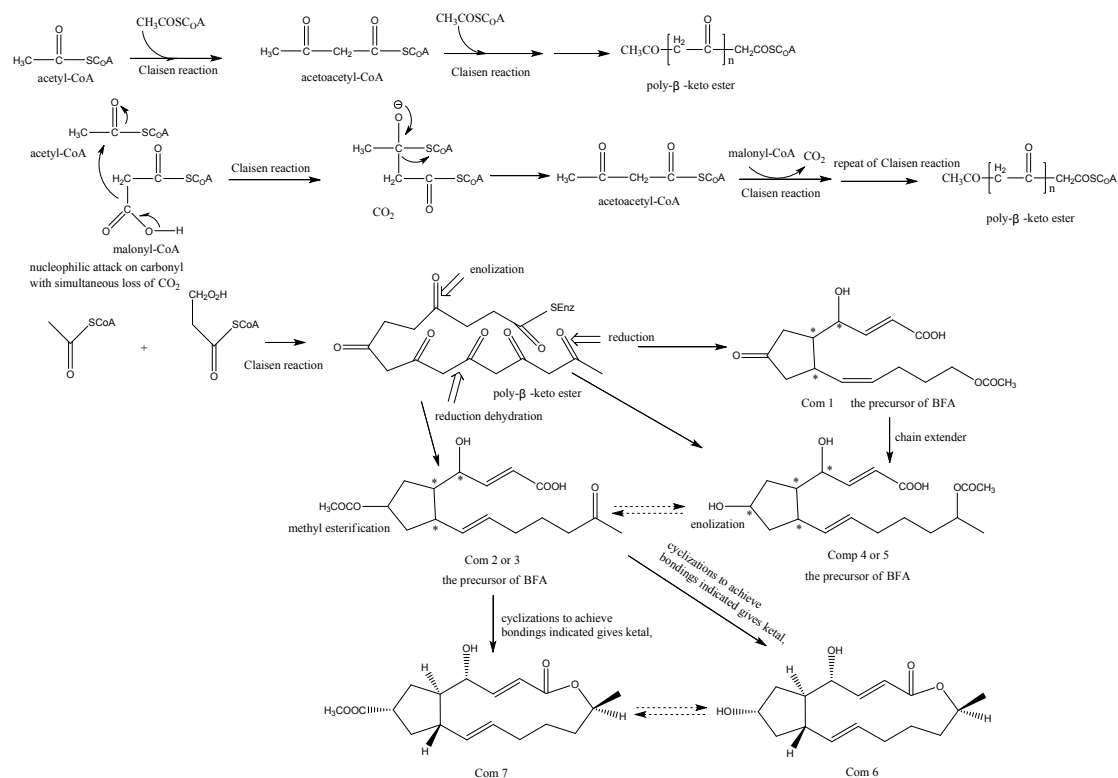

Compounds 1-7 structures could be explained as being derived from poly-β-keto chains, formed by coupling of acetic acid (C<sub>2</sub>) units via condensation reactions. The formation of the poly-β-keto chain could be envisaged as a series of Claisen reactions. Two molecules of acetyl-CoA could participate in a Claisen condensation giving acetoacetyl-CoA, and this reaction could be repeated to generate a poly-β-keto ester of appropriate chain length. The conversion of acetyl-CoA into malonyl-CoA increased the acidity of the α-hydrogens, and thus provided a better nucleophile for the Claisen condensation. In the biosynthetic sequence, no acylated malonic acid derivatives were produced, and no label from [14C] bicarbonate was incorporated, so the carboxyl group introduced into malonyl-CoA was simultaneously lost by a decarboxylation reaction during the Claisen condensation.



Table S1 <sup>1</sup>H NMR Chemical Shift Data for Diagnostic Signals from the (S)- and (R)-Ester Derivatives of **1**<sup>a</sup>,**2**<sup>b</sup>,**3**<sup>c</sup>,**4**<sup>d</sup>,**5**<sup>e</sup> (Measured at 600 MHz in CDCl<sub>3</sub>)

|                           |         | <sup>a</sup> proton chemical shifts ( $\Delta\delta_{\text{H}} = \delta_{\text{S}} - \delta_{\text{R}}$ ) |        |         |         |         |         |         |         |
|---------------------------|---------|-----------------------------------------------------------------------------------------------------------|--------|---------|---------|---------|---------|---------|---------|
| MTPA-ester                | H-2     | H-3                                                                                                       | H-4    | H-5     | H-6     | H-8     | H-9     |         |         |
| R                         | 5.8750  | 6.1645                                                                                                    | 5.2496 | 2.1117  | 2.5549  | 2.1117  | 2.2745  | 2.2522  | 2.9325  |
| S                         | 6.1021  | 7.0267                                                                                                    | 4.5579 | 2.1095  | 2.5161  | 2.1095  | 2.2668  | 2.1963  | 2.8655  |
| $\Delta\delta_{\text{H}}$ | +0.2271 | +0.8622                                                                                                   |        | -0.0022 | -0.0388 | -0.0022 | -0.0077 | -0.0559 | -0.0670 |

  

|                           |         | <sup>b</sup> proton chemical shifts ( $\Delta\delta_{\text{H}} = \delta_{\text{S}} - \delta_{\text{R}}$ ) |        |        |         |        |        |        |        |        |
|---------------------------|---------|-----------------------------------------------------------------------------------------------------------|--------|--------|---------|--------|--------|--------|--------|--------|
| MTPA-ester                | H-2     | H-3                                                                                                       | H-4    | H-5    | H-6     | H-7    | H-8    | H-9    |        |        |
| R                         | 6.0950  | 7.0727                                                                                                    | 4.3880 | 1.8790 | 1.7175  | 1.9981 | 5.1017 | 2.3442 | 1.5265 | 2.4436 |
| S                         | 6.1001  | 7.0909                                                                                                    | 4.3981 | 1.8760 | 1.7076  | 1.9982 | 5.1008 | 2.3446 | 1.5262 | 2.4463 |
| $\Delta\delta_{\text{H}}$ | +0.0051 | +0.0182                                                                                                   |        | -0.003 | -0.0099 |        |        |        |        |        |

  

|                           |         | <sup>c</sup> proton chemical shifts ( $\Delta\delta_{\text{H}} = \delta_{\text{S}} - \delta_{\text{R}}$ ) |        |         |         |        |        |        |        |        |
|---------------------------|---------|-----------------------------------------------------------------------------------------------------------|--------|---------|---------|--------|--------|--------|--------|--------|
| MTPA-ester                | H-2     | H-3                                                                                                       | H-4    | H-5     | H-6     | H-7    | H-8    | H-9    |        |        |
| R                         | 6.1010  | 7.0959                                                                                                    | 4.3979 | 1.8771  | 1.7079  | 1.9976 | 5.1009 | 2.3440 | 1.5269 | 2.4473 |
| S                         | 6.0934  | 7.0712                                                                                                    | 4.3865 | 1.8774  | 1.7163  | 1.9966 | 5.1001 | 2.3431 | 1.5250 | 2.4470 |
| $\Delta\delta_{\text{H}}$ | -0.0076 | -0.0247                                                                                                   |        | +0.0055 | +0.0084 |        |        |        |        |        |

  

|                           |         | <sup>d</sup> proton chemical shifts ( $\Delta\delta_{\text{H}} = \delta_{\text{S}} - \delta_{\text{R}}$ ) |        |         |         |         |        |         |        |        |
|---------------------------|---------|-----------------------------------------------------------------------------------------------------------|--------|---------|---------|---------|--------|---------|--------|--------|
| MTPA-ester                | H-2     | H-3                                                                                                       | H-4    | H-5     | H-6     | H-7     | H-8    | H-9     |        |        |
| R                         | 6.0857  | 7.0970                                                                                                    | 4.3755 | 1.8024  | 1.6454  | 1.5872  | 4.3456 | 2.2524  | 1.3656 | 2.4202 |
| S                         | 6.0877  | 7.1006                                                                                                    | 4.3744 | 1.7994  | 1.6495  | 1.5904  | 4.3483 | 2.2481  | 1.3656 | 2.4143 |
| $\Delta\delta_{\text{H}}$ | +0.0020 | +0.0036                                                                                                   |        | -0.0030 | +0.0041 | +0.0032 |        | -0.0043 |        | -0.002 |

  

|                           |         | <sup>e</sup> proton chemical shifts ( $\Delta\delta_{\text{H}} = \delta_{\text{S}} - \delta_{\text{R}}$ ) |        |         |         |         |        |         |        |         |
|---------------------------|---------|-----------------------------------------------------------------------------------------------------------|--------|---------|---------|---------|--------|---------|--------|---------|
| MTPA-ester                | H-2     | H-3                                                                                                       | H-4    | H-5     | H-6     | H-7     | H-8    | H-9     |        |         |
| R                         | 6.1121  | 7.0863                                                                                                    | 4.4173 | 1.7987  | 1.7255  | 1.5977  | 4.3249 | 2.2433  | 1.3800 | 2.4182  |
| S                         | 6.1148  | 7.0930                                                                                                    | 4.4199 | 1.7957  | 1.7073  | 1.5900  | 4.3360 | 2.2504  | 1.3800 | 2.4230  |
| $\Delta\delta_{\text{H}}$ | +0.0027 | +0.0067                                                                                                   |        | -0.0030 | -0.0182 | -0.0077 |        | +0.0071 |        | +0.0048 |
